1  
2  
3  
4  
5  
6  
7  
8  
9  
10  
11  
12  
13  
14  
15  
16  
17  
18  
19

## **Classification and phylogeny for the annotation of novel eukaryotic**

### **GNAT acetyltransferases**

Bojan Krtenic<sup>1,2\*</sup>, Adrian Drazic<sup>3</sup>, Thomas Arnesen<sup>1,3,4</sup>, Nathalie Reuter<sup>2,5\*</sup>

1. Department of Biological Sciences, University of Bergen, Norway

2. Computational Biology Unit, Department of Informatics, University of Bergen, Norway

3. Department of Biomedicine, University of Bergen, Norway

4. Department of Surgery, Haukeland University Hospital, Norway

5. Department of Chemistry, University of Bergen, Norway

\* To whom correspondence should be addressed. Tel (+47) 555 84040. Email:

[Nathalie.Reuter@uib.no](mailto:Nathalie.Reuter@uib.no)

Keywords: N-terminal acetyltransferases, NAT, GNAT, lysine acetyltransferase, KAT, sequence similarity networks, phylogeny

## 20 **Abstract**

21 The enzymes of the GCN5-related N-acetyltransferase (GNAT) superfamily count more than 870  
22 000 members through all kingdoms of life and share the same structural fold. GNAT enzymes transfer  
23 an acyl moiety from acyl coenzyme A to a wide range of substrates including aminoglycosides,  
24 serotonin, glucosamine-6-phosphate, protein N-termini and lysine residues of histones and other  
25 proteins. The GNAT subtype of protein N-terminal acetyltransferases (NATs) alone targets a majority  
26 of all eukaryotic proteins stressing the omnipresence of the GNAT enzymes. Despite the highly  
27 conserved GNAT fold, sequence similarity is quite low between members of this superfamily even  
28 when substrates are similar. Furthermore, this superfamily is phylogenetically not well characterized.  
29 Thus functional annotation based on homology is unreliable and strongly hampered for thousands of  
30 GNAT members that remain biochemically uncharacterized. Here we used sequence similarity  
31 networks to map the sequence space and propose a new classification for eukaryotic GNAT  
32 acetyltransferases. Using the new classification, we built a phylogenetic tree, representing the entire  
33 GNAT acetyltransferase superfamily. Our results show that protein NATs have evolved more than  
34 once on the GNAT acetylation scaffold. We use our classification to predict the function of  
35 uncharacterized sequences and verify by *in vitro* protein assays that two fungi genes encode NAT  
36 enzymes targeting specific protein N-terminal sequences, showing that even slight changes on the  
37 GNAT fold can lead to change in substrate specificity. In addition to providing a new map of the  
38 relationship between eukaryotic acetyltransferases the classification proposed constitutes a tool to  
39 improve functional annotation of GNAT acetyltransferases.

40

## 41 **Author Summary**

42 Enzymes of the GCN5-related N-acetyltransferase (GNAT) superfamily transfer an acetyl  
43 group from one molecule to another. This reaction is called acetylation and is one of the most common  
44 reactions inside the cell. The GNAT superfamily counts more than 870 000 members through all  
45 kingdoms of life. Despite sharing the same fold the GNAT superfamily is very diverse in terms of

46 amino acid sequence and substrates. The eight N-terminal acetyltransferases (NatA, NatB, etc.. to  
47 NatH) are a GNAT subtype which acetylates the free amine group of polypeptide chains. This  
48 modification is called N-terminal acetylation and is one of the most abundant protein modifications  
49 in eukaryotic cells. This subtype is also characterized by a high sequence diversity even though they  
50 share the same substrate. In addition the phylogeny of the superfamily is not characterized. This  
51 hampers functional annotation based on homology, and discovery of novel NATs. In this work we  
52 set out to solve the problem of the classification of eukaryotic GCN5-related acetyltransferases and  
53 report the first classification framework of the superfamily. This framework can be used as a tool for  
54 annotation of all GCN5-related acetyltransferases. As an example of what can be achieved we report  
55 in this paper the computational prediction and *in vitro* verification of the function of two previously  
56 uncharacterized N-terminal acetyltransferases. We also report the first acetyltransferase phylogenetic  
57 tree of the GCN5 superfamily. It indicates that N-terminal acetyltransferases do not constitute one  
58 homogeneous protein family, but that the ability to bind and acetylate protein N-termini had evolved  
59 more than once on the same acetylation scaffold. We also show that even small changes in key  
60 positions can lead to altered enzyme specificity.

61

## 62 **Introduction**

63       Transfer of an acetyl group from one molecule to another is one of the most common reactions  
64 inside the cell. The rich and diverse, but structurally highly conserved, superfamily of GCN5-related  
65 acetyltransferases is one of the enzyme superfamilies able to catalyze the acetylation reaction (1–3).  
66 Members of the GCN5-related acetyltransferase superfamily are able to accommodate numerous  
67 types of substrates including lysine sidechains (4–6) and N-termini of proteins (7), serotonin (8),  
68 glucosamine 6-phosphate (9), polyamines (10) and others. N-terminal acetylation is one of the most  
69 abundant protein modifications in eukaryotic cells, with over 80% of proteins susceptible to  
70 acetylation in higher eukaryotes (11). The reaction entails transfer of an acetyl group from a substrate  
71 donor, most often acetyl coenzyme A, to a substrate acceptor, which is the N-terminus of the

72 acetylated protein (12). The abundance of N-terminal acetylation implies numerous effects of this  
73 modification on normal cell functioning and, indeed, it has been shown that N-terminal acetylation  
74 affects protein synthesis indirectly (13), protein folding (14,15), protein half-life (16), protein-protein  
75 (17) and protein-lipid interactions (18) protein targeting (19), apoptosis (20,21), cancer (22), a variety  
76 of congenital anomalies and autism spectrum disorder (23–26). Despite the importance of N-terminal  
77 acetylation the number of N-terminal acetylating enzymes and cellular pathways remain unclear.

78 Thus far eight N-terminal acetyltransferases (NATs) have been discovered in eukaryotes with  
79 the last one identified in 2018 (27,28,37–42,29–36). NATs are named NatA-NatH, by convention,  
80 and their catalytic subunits, which are the focus of this work, are named NAA10-NAA80. Each of  
81 the catalytic subunits has the same fold, called the GNAT fold. GNAT is the acetylation scaffold in  
82 the entire GCN5-related acetyltransferase superfamily (2,3). It is an  $\alpha$ - $\beta$ - $\alpha$  layered structure with a  
83 characteristic V-shaped splay between the two core parallel  $\beta$ -strands (usually  $\beta$ 4 and  $\beta$ 5 strands) (**Fig**  
84 **1**). Together with the core strands, two loops (usually  $\alpha$ 1- $\alpha$ 2 and  $\beta$ 6- $\beta$ 7 loops) are involved in catalysis  
85 and substrate binding. They are located on one side of the splay. On the other side an  $\alpha$ -helix (usually  
86  $\alpha$ 3) common to all acetyltransferases binds Ac-CoA (2,3) (**Fig 1**). While the  $\beta$ 4 and  $\beta$ 5 strands and  
87 the loops  $\alpha$ 1- $\alpha$ 2 and  $\beta$ 6- $\beta$ 7, are structurally quite conserved, their amino acid sequence varies with  
88 ligand specificity (2,3,43–50). Consequently, the key determinants of the ligand specificity of an  
89 acetyltransferase are sequence motifs in the crucial positions on the GNAT fold.

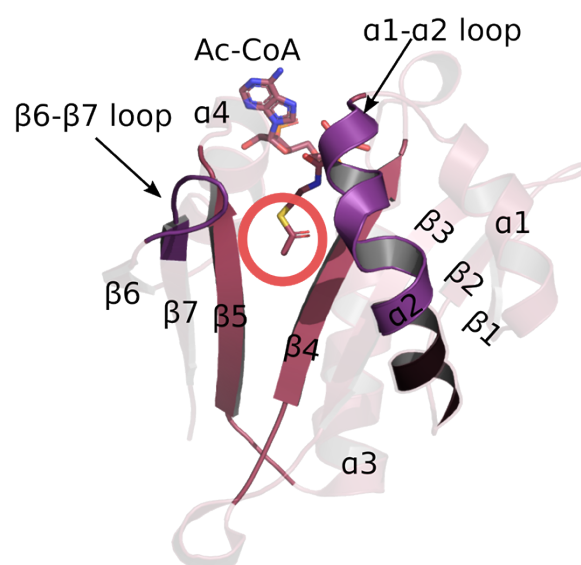

90

91 **Figure 1. GNAT fold is the acetylation scaffold in the acetyltransferase superfamily.** The fold  
92 positions the two substrates in such a way that the acetyl group of Ac-CoA approaches the N-terminus  
93 of the protein acceptor in the middle of the V-shaped splay between  $\beta 4$  and  $\beta 5$  strands – marked with  
94 the red circle. Four structural motifs have been identified in the GNAT fold: motif A consists of the  
95  $\beta 4$  strand and  $\alpha 3$  helix, motif B is the  $\beta 5$  strand and  $\alpha 4$  helix, motif C includes the  $\beta 1$  strand and  $\alpha 1$   
96 helix, and motif D consists in the  $\beta 2$  and  $\beta 3$  strands (2).

97  
98 The NATs can be more or less promiscuous when it comes to substrate specificity (7). Usually  
99 the first two residues of a substrate protein determine whether the protein can be acetylated (11).  
100 There is some overlap between *in vitro* specificities of NATs (11,51) and interestingly, it has been  
101 shown that some non-NAT acetyltransferases have the ability to N-terminally acetylate polypeptide  
102 chains. Glucosamine 6-phosphate acetyltransferases are one such example and were recently shown  
103 to *in vitro* acetylate N-terminal serine (52). NATs are referred to as a *family* of enzymes since they  
104 all acetylate the same type of substrate, namely protein N-termini, but the fact is that there is no  
105 deeper classification than at the *superfamily* level for all GNAT acetyltransferases.

106 Majority of all known types of acetyltransferases are members of the same Pfam (53) family  
107 (Acetyltransf\_1, code: PF00583) which contains almost 50% of the entire acetyltransferase clan  
108 (Pfam code: CL0257). The Acetyltransf\_1 Pfam family contains 120,379 sequences out of the  
109 280,421 sequences of the acetyltransferase clan and consists of numerous types of acetyltransferases.  
110 PROSITE (54) does not differentiate between different types of acetyltransferases either and  
111 recognizes four types of GNAT fold: GNAT (PS51186), GNAT\_ATAT (PS51730), GNAT\_NAGS  
112 (PS51731) and GNAT\_YJDJ (PS51729). The CATH database (55) offers a slightly better  
113 classification than Pfam or PROSITE, but CATH does not accurately differentiate between all known  
114 NAT sequences. As a result, and despite extensive efforts on the experimental front, the current  
115 classification of acetyltransferases is based on a collection of ligand specificity assays which can only  
116 sparsely cover the variety of enzymes in the superfamily.

117 Several studies have identified a large number of proteins that can be N-terminally acetylated  
118 (27,41,51,56–58). Much of the identified acetylated N-termini can be explained by currently known  
119 NATs (11,51). However, we do not know whether or not known NATs acetylate other exotic N-  
120 termini found to be N-terminally acetylated in cells, such as those with acetylated initial tyrosine  
121 (PCD23\_HUMAN, KS6A5\_HUMAN, etc) (51). N-terminal acetylation events following post-  
122 translational protease action are not well characterized either; known NATs except NatF, NatG and  
123 NatH sit on the ribosome and catalyze cotranslational acetylation (59). Therefore, there might be  
124 unidentified NATs in eukaryotes responsible for such events. The lack of a classification of  
125 acetyltransferases at the *family* level hinders functional annotation based on homology, and hence  
126 slows down the identification of new NATs.

127 In order to create a better classification framework for the eukaryotic acetyltransferase  
128 superfamily we used a combination of bioinformatics sequence analysis consisting in sequence  
129 similarity networks (SSNs), motif discovery and phylogenetic analysis. We showed that N-terminal  
130 acetyltransferases do not constitute one homogeneous *family*, even though they acetylate the same  
131 type of substrate. Our analyses all converge to the conclusion that NATs evolved more than once.  
132 Finally, we could predict and experimentally verify that two uncharacterized sequences from fungi  
133 closely related to two known NATs, NAA50 and NAA60, encode NAT enzymes targeting specific  
134 protein N-terminal sequences. This experimental validation gives us confidence that our classification  
135 will be a valuable tool for identification and annotation of new superfamily members.

136

137

## 138 **Results**

### 139 **1. Sequence similarity networks (SSNs)**

140 We collected from UniProt all eukaryotic sequences matching the GNAT signature defined by  
141 PROSITE. The collected sequences were then filtered at 70% identity to reduce the size of the dataset,  
142 using h-cd-hit (60), which resulted in a dataset of 14,396 sequences. We also collected a second

143 dataset restricted to the sequence of the GNAT-domains. We generated SSNs for each of the datasets  
144 using EFI-EST (61). By adjusting the E-value and alignment score threshold for drawing SSN edges  
145 (**Fig s1**), we created an SSN with the highest probability of having isofunctional clusters. Both SSNs  
146 resulted in a sparse topology indicating a high sequence diversity in the acetyltransferase superfamily  
147 (**Fig s2**). The convergence ratio of the SSN built from the full-length sequences is 0,008 and it is  
148 equal to 0,009 for the network build from the GNAT domains only. This illustrates the high level of  
149 divergence between acetyltransferases.

150 We used the clusterONE algorithm (62) through Cytoscape (63) to determine the boundaries  
151 between each cluster in our SSNs. We identified 232 clusters in the full-length sequence SSN and  
152 221 clusters in the GNAT domain SSN. Since the results for both networks are highly similar, we  
153 opted to use the full-sequence SSN for further analyses. When applying clusterONE to SSNs, we  
154 used the percentage of sequence identity as edge weight to make sure that clusters are identified based  
155 on a reliable measure of similarity. Dense regions thus correspond to closely related sequences. We  
156 also observe that, with few exceptions, known acetyltransferases of one particular function never  
157 appear in multiple clusters. We can thus reasonably assume that the clusters in our SSN are  
158 isofunctional.

159 In order to better visualize the relationships between clusters we represented the SSNs as  
160 simplified, “pivot”, networks. Each cluster of the original SSN is represented by a single node. An  
161 edge between nodes in the simplified network is drawn where there was at least one edge between  
162 any nodes of the two corresponding clusters in the original SSN (**Fig 2 and Fig s3**). The main  
163 topological characteristics of the SSNs are network sparsity, the resulting absence of SSN hubs,  
164 several connected components that contain a varying number of clusters, and a large number of  
165 isolated clusters (**Fig 2**). We identified 48 clusters with known acetyltransferases. A majority of  
166 proteins in our SSN are from fungi (**Fig s3**), but all eukaryotic kingdoms are represented. There is a  
167 total of 80 *Homo sapiens* proteins in the SSN, spread into 21 clusters. The observed clustering is not  
168 based on taxonomy of acetyltransferases from higher and lower eukaryotes, but instead correlates

169 with ligand specificity (**Figures s4-s8**). Interestingly, acetyltransferases that acetylate the same type  
 170 of substrate (e.g. either N-termini of proteins or histones) are not necessarily found within the same  
 171 connected component but are scattered over the SSN. This is the case with NATs, which are found  
 172 clustering together with other types of acetyltransferases rather than forming one homogeneous  
 173 group. This is the first indicator that NATs do not constitute one homogeneous family but have,  
 174 rather, evolved more than once on the same scaffold.

175

176

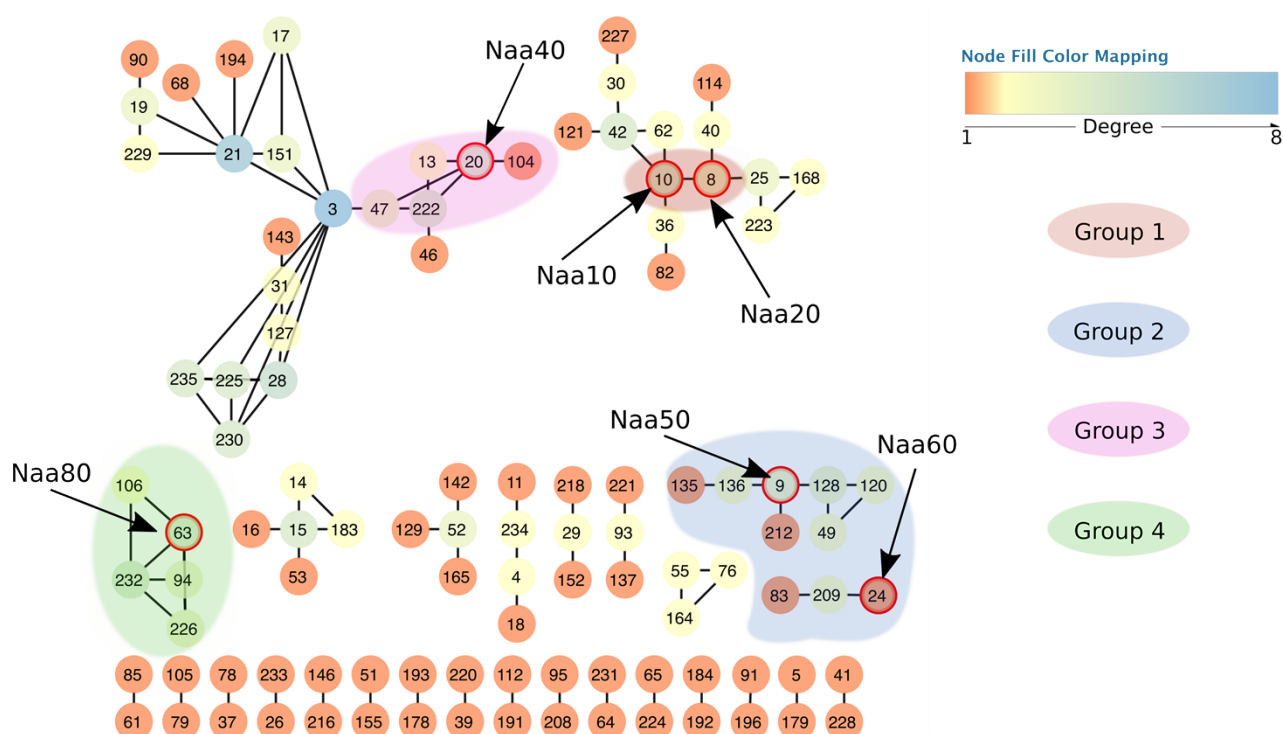

177

178

179 **Figure 2 Simplified view of the resulting sequence similarity network.** Each node represents one  
 180 cluster from the original network. Edges connect two nodes in the simplified network if there is at  
 181 least one edge between any nodes of the corresponding clusters in the full network. Node colors  
 182 correspond to their degree, i.e. the number of connections to the neighboring nodes. Each node in the  
 183 network has a unique number assigned by clusterONE (62). The numbers serve as cluster names in  
 184 cases where the cluster is uncharacterized. All nodes circled in red are known and experimentally  
 185 confirmed N-terminal acetyltransferases (10 – NAA10, 8 – NAA20, 20 – NAA40, 9 – NAA50, 26 –



186 NAA60 and 63 – NAA80). The network shows four NAT groups. Group 5 contains NAA70 but is  
187 not shown since it is formed by one single cluster (number 100) which is not connected to the rest of  
188 the network. For the same reason the cluster containing NAA30 is not shown either.

189

190

## 191 **2. Identification of five NATs groups and their sequence motif fingerprints**

192 Known NATs do not all inhabit the same connected components of the SSN (**Fig 2**), which  
193 indicates NATs are not one homogeneous family of acetyltransferases. We used MEME (64) from  
194 the MEME suite (65) to identify motifs in each of the SSN clusters. Sequence motifs of highly  
195 conserved residues were detectable for each of the clusters. Based on the similarity between motifs  
196 and on the clustering of the NATs in the SSN, we defined five different groups of NATs (**Fig 2**). We  
197 subsequently calculated sequence motifs for each of these groups. The motifs are shown in **Fig 3** and  
198 **Table 1**.

199 Group 1 contains NAA10, NAA20 and NAA30. NAA10 and NAA20 are in the same connected  
200 component, while NAA30 is found in a single isolated cluster. The sequence motifs that are important  
201 for binding of substrate and acetylation in the group 1 NATs are localized on the  $\alpha 1$ - $\alpha 2$  loop, the  $\beta 4$   
202 and  $\beta 5$  strands and the  $\beta 6$ - $\beta 7$  loop (45,46,48) (**Fig s9**) and this is true for groups 2 and 3 as well.  
203 Group 2 consists of NAA50 and NAA60. NAA50 and NAA60 do not cluster together in the SSN but  
204 the resemblance between their key sequence motifs (**Fig s10**) justifies placing them in the same group.  
205 We define Group 3 around Naa40. A striking characteristic of NAA40 is its long  $\alpha 0$  helix and the  
206 position of its  $\alpha 1$ - $\alpha 2$  loop (49) which extends over and covering the binding site where the  $\beta 6$ - $\beta 7$  loop  
207 lies in other NATs. Group 4 is defined around NAA80 which is structurally different from the first  
208 three groups. Its surface shows a large cleft which is covered by loops in all other NAT structures  
209 available to date (50). The need for a larger ligand binding site is explained by the fact that NAA80  
210 has evolved to catalyzes N-terminal acetylation of fully folded actin and harbors an extensive binding  
211 surface to actin (66). Finally, Group 5 contains NAA70 which is a chloroplast NAT discovered in

212 *Arabidopsis thaliana* (29). NAA70 is closer to bacterial acetyltransferases than to the eukaryotic ones  
 213 in Groups 1 to 4. A BLAST search against the NCBI non-redundant database (67) and excluding  
 214 green plants, suggests that NAA70 is most similar to cyanobacterial proteins with the best hit being  
 215 a protein from *Gleocapsa sp* (29,7 %id over 62% query cover). We also found that NAA70 shares a  
 216 high percentage of sequence identity with *Enterococcus faecalis* acetyltransferase whose structure  
 217 has been solved (PDB code 1U6M). Unfortunately, there is not enough reliable structure information  
 218 on NAA70 to be able to map the position of the key sequence motifs onto the secondary structure  
 219 elements.  
 220

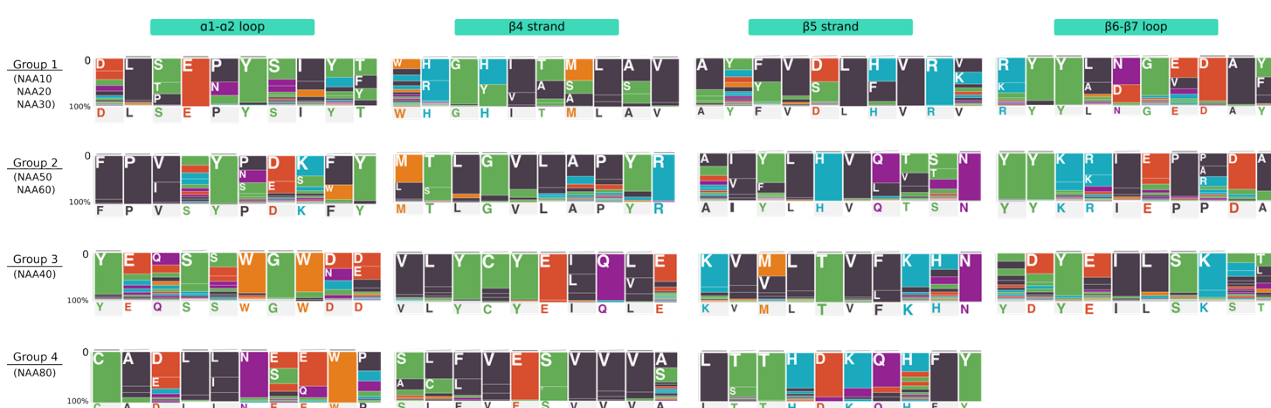

221  
 222 **Figure 3. Characteristic sequence motif fingerprints of NAT Groups 1 to 4.** Sequence motifs  
 223 were calculated as described in the Methods section and using sequences from the SSN clusters. Each  
 224 position in the motif is represented by a colored bar and a one-letter code for the amino acid frequently  
 225 found at that position in the GNAT fold. The length of colored bar is proportional to the frequency  
 226 of the corresponding amino acid. The colors correspond to the type of amino acid (black:  
 227 hydrophobic, red: acidic) Group 5 is not shown as the structure of NAA70 has not been solved.  
 228  
 229

230 While there are important differences between each of the groups in terms of sequence motifs,  
 231 some similarities emerge (**Fig 3**). They are especially obvious between groups 1 and 2, where we can  
 232 observe a well conserved tyrosine in the  $\alpha 1$ - $\alpha 2$  loop (**Fig 3 and Fig s11**) and most importantly,

233 another conserved tyrosine in the  $\beta 6$ - $\beta 7$  loop (**Fig 3 and Fig s11**). This tyrosine is essential for  
 234 function and is strictly conserved in all members of groups 1 and 2 (43–45,48,68). The tyrosine in  
 235 the  $\alpha 1$ - $\alpha 2$  loop is conserved in all NATs of group 1 and group 2 (43,44,69) except for NAA20 where  
 236 it is replaced by phenylalanine (45). Group 3 and group 4 motifs clearly differ from those of group 1  
 237 (**Fig 3**). Compared to the other groups, strands  $\beta 4$  and  $\beta 5$  stand out in groups 3 and 4 where they play  
 238 a major role in substrate binding and catalysis. Interestingly their sequence motifs and key residue  
 239 positions differ between the two groups (49,50).

240

241 **Table 1. Regular expressions for key sequence motifs of NATs Groups 1 to 4.** All regular  
 242 expressions were calculated using MEME from MEME Suite (65).

| Group / ss element | $\alpha 1$ - $\alpha 2$      | $\beta 4$                     | $\beta 5$                 | $\beta 6$ - $\beta 7$     |
|--------------------|------------------------------|-------------------------------|---------------------------|---------------------------|
| <b>Group 1</b>     | DL[STP]E[PN]YSIY[TFY]        | W[HR]G[HY][IV][TA][MSA]L[AS]V | AY[FY]V[DS]L[HF]VR[VK]    | [RK]YY[LA][ND]G[EV]DA[YF] |
| <b>Group 2</b>     | FP[V]I[XY][PNS][DE][KS][FW]Y | LYI [ML][TS]LGVLPYR           | A[IV][YF]LHV[QL][TV][ST]N | HS[FY]LPYYYSI             |
| <b>Group 3</b>     | YEQSSWG[DN][DE]              | VLYCYE[IL]Q[LV]E              | KV[MV]LTV[FL]KHN          |                           |
| <b>Group 4</b>     | CA[DE]L[LI]N[ES][EQ]W[PK]    | [SA][LC][FL]VE[ST]V[VV][AS]   | L[TS]THDKQHFY             |                           |

244

### 245 3. Structure comparison

246 We compared structures of acetyltransferases to one another using the DALI server (70). Our dataset  
 247 consists in structures of 38 catalytic subunits of acetyltransferases, all belonging to our SSN. The  
 248 resulting dendrogram (**Fig 4**) shows a classification that overlaps with that of the SSN. In addition, it  
 249 highlights that Groups 1 and 2 are more similar to one another than to the other NATs, and to the rest  
 250 of the entire superfamily. NAA40 (Group 3) is the NAT closest to NAA80 (Group 4), to the histone  
 251 acetyltransferase GCN5, to the dopamine N-acetyltransferase and to the arylalkylamine N-  
 252 acetyltransferase. The proximity of NAA40 and NAA80 is only observed in the structure-based  
 253 classification and was not observed in the sequence similarity network. NAA80 is also close to the  
 254 histone acetyltransferase GCN5. Groups 1, 2, 3 and 4 of NATs are more similar to one another than  
 255 to the rest of the superfamily when structures are compared, but this is not the case when sequences

256 are compared. In-between these 4 groups one finds non-NAT acetyltransferases, namely the histone  
257 acetyltransferase GCN5 (cluster 1) and serotonin acetyltransferases (cluster 122).

258       It is important to mention that while we can see differences in structures of different  
259 acetyltransferases, they are still quite similar to one another. One indication of how small the  
260 differences are between structures is the fact that the structures of NAA40 with and without substrate  
261 are found to be very distant from one another in the dendrogram (blue branches on **Fig 4**). This is the  
262 result of the position of the  $\beta$ 6- $\beta$ 7 loop which is opened without the substrate and closed with the  
263 substrate bound to the enzyme (49). We verified the proximity of the structures by building a network  
264 based on a structure similarity matrix. The resulting network is random with all nodes connected to  
265 all nodes when we use a Z-score higher than 2, which is considered to be significant as a threshold  
266 for an edge between two nodes (71). The Z-score threshold needs to be increased to at least 15 for  
267 cluster separation in the similarity network to appear (**Fig s12**).

268

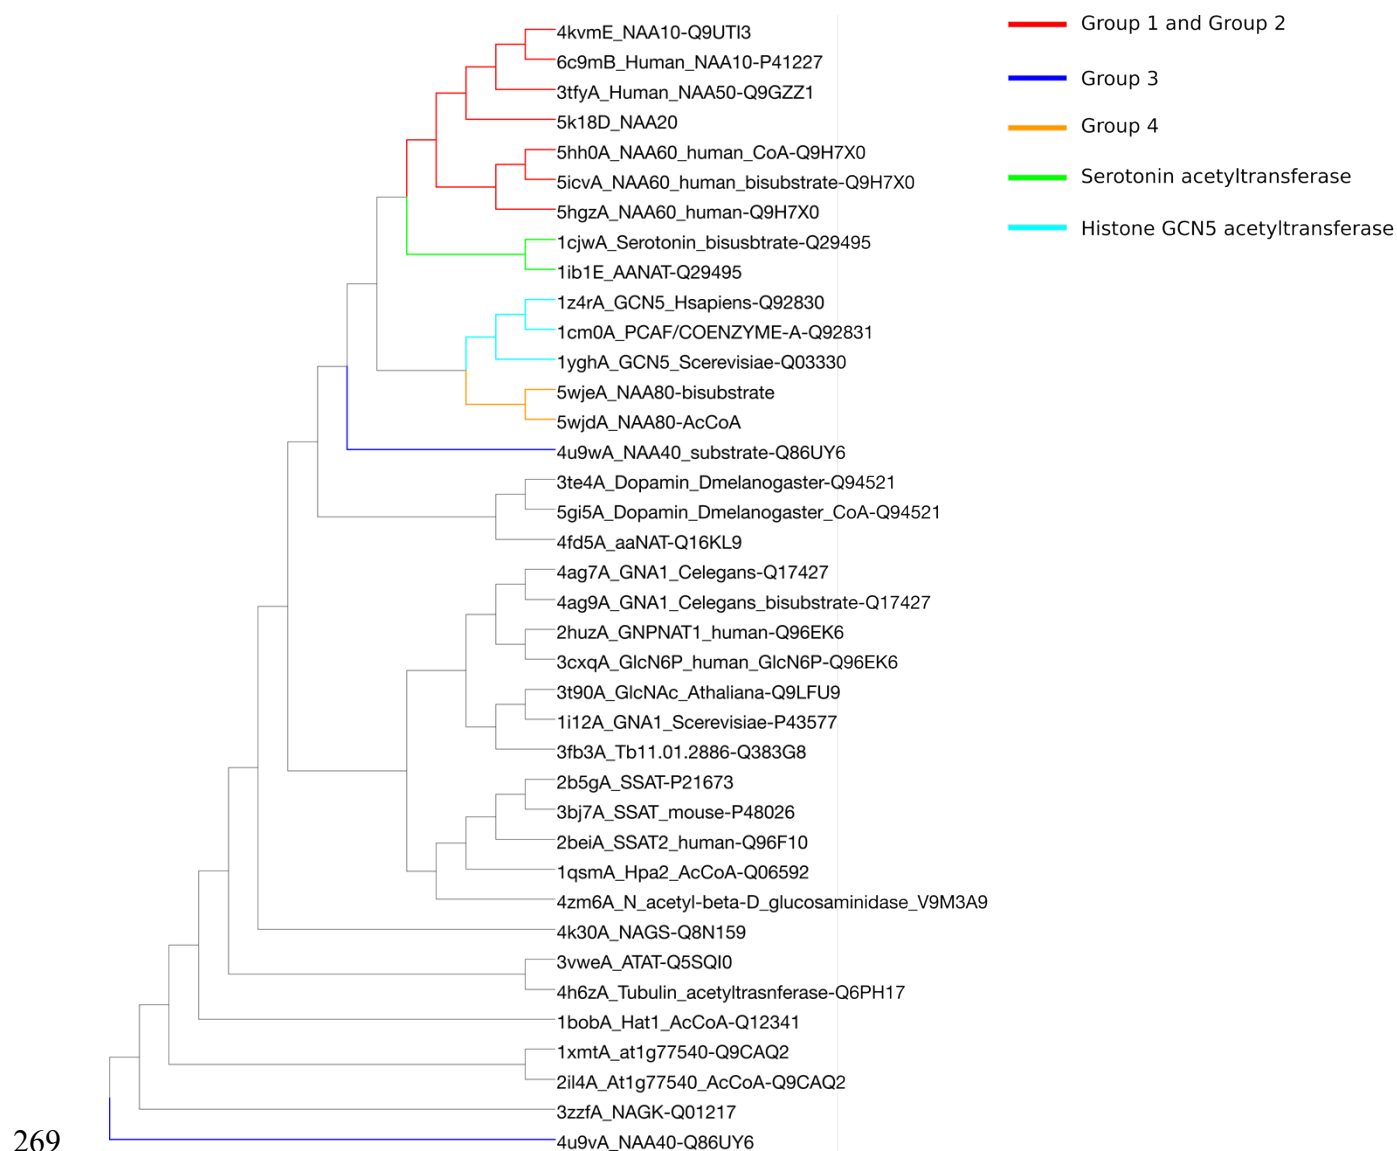

270

271 **Figure 4. DALI dendrogram for structural similarity between acetyltransferases.** The known  
 272 NATs (Groups 1 to 4) are closer to one another than to the rest of the superfamily. Note the non-NAT  
 273 acetyltransferases located close to known NATs.

274

#### 275 4. Phylogeny

276 We used the clustering information obtained from the smallworld SSN (**Fig.S13**) to generate the  
 277 dataset for phylogeny. We selected 3 random sequences per SSN cluster and created an MSA for the  
 278 structural motifs A ( $\beta$ 4 and  $\alpha$ 3) and B ( $\beta$ 5 and  $\alpha$ 4) of the GNAT fold (See **Fig 1** and **Fig S15**). They  
 279 are the most conserved structural motifs across the superfamily (2) and their alignment yields a better

280 MSA than a whole-sequence alignment would. Note that NAA70 was not included in the MSA  
281 because it is not found in the connected component of the SSN used to generate the phylogeny dataset.

282 The phylogenetic tree is shown in **Figure 5**. The branching in the tree clearly reflects the four  
283 different groups of NATs corresponding to Groups 1 to 4 in the SSN shown in **Fig.2**. NATs from  
284 Group 1 (NAA10, NAA20, NAA30) and Group 2 (NAA50 and NAA60) are closely related according  
285 to the tree (**Fig 5**) and according to the smallworld SSN (**Fig s13**). This is in agreement with evidence  
286 that NAA10 and NAA50 have evolved from the same archaeal ancestor (72). Groups 3 and 4 appear  
287 close to each other as well. NAA40 and NAA80 share a common ancestor. Several distinct branches  
288 of the tree carry a particular type of acetyltransferases (**Fig 5**), but even within some of these branches  
289 we see acetyltransferases acetylating different types of substrates. We have mapped the SSN clusters  
290 to the tree in order to observe evolutionary relationships between NATs and other identified  
291 acetyltransferases.

292 The tree shows several acetyltransferases, annotated as non-NAT enzymes, sharing a common  
293 ancestor with group 1 NATs (red and magenta branches). For example, a histone acetyltransferase  
294 (KAT14 – cluster 18) is found close to Group 1 of NATs (NAA10 and NAA20) and these sequences  
295 are the closest relatives according to the tree. An MSA of these acetyltransferases (**Fig s16**) reveals  
296 that KAT14 and sequences in Group 1 share sequence motifs. Indeed, the best conserved sequence  
297 motif found in Groups 1 and 2, located on the  $\beta$ 6- $\beta$ 7 loop, is conserved in KAT14, as well. The  $\beta$ 6-  
298  $\beta$ 7 loop motif contains a tyrosine present in all Group 1 and Group 2 N-terminal acetyltransferases  
299 (NAA10, NAA20, NAA30, NAA50 and NAA60). This tyrosine has been shown to be essential for  
300 substrate binding (43,48,68) and it has been suggested that the size and flexibility of the  $\beta$ 6- $\beta$ 7 loop  
301 plays an important role in substrate recognition (2,73). Based on similarity between the  $\beta$ 6- $\beta$ 7 loop  
302 of KAT14 and the NATs from Groups 1 and 2 and given the fact that the  $\beta$ 6- $\beta$ 7 loop differs in size  
303 and primary sequence in other acetyltransferases, it is not excluded that KAT14 might be able to  
304 accommodate the same type of substrate as NATs and acetylate N-termini of proteins.

305           Looking now more specifically at the branches around Group 2 (green branches), we can see  
306 that clusters 49, 120, 128, 135, 136 and 212 are found close to NAA50 (cluster 9) and share a common  
307 ancestor (**Fig 5**). Clusters 83 and 209 are found close to NAA60 in the phylogenetic tree as well (**Fig**  
308 **5**). Additionally, according to the tree, clusters 122, 78, 16 and 37 share a common ancestor with  
309 NAA60. Cluster 122 is a serotonin N-acetyltransferase (74) and forms a single cluster in the stringent  
310 SSN. There are similarities between serotonin N-acetyltransferase and NAA60. Like NAA60,  
311 serotonin acetyltransferase has a long  $\beta$ 3- $\beta$ 4 loop unlike other NATs (44) (**Fig s17**). Catalytic  
312 residues are positioned similarly in both enzymes. Tyr97 in NAA60 and His 120 in serotonin  
313 acetyltransferase have equivalent positions in on the GNAT fold (**Fig s17**). The other catalytic residue  
314 of NAA60 (His138) and cluster 122 serotonin acetyltransferase (His122) are both located in the core  
315 of the GNAT fold (**Fig s17**) even if their positions are not equivalent. Cluster 16 is annotated as a  
316 polyamine acetyltransferase (75,76) and it establishes weak connections with, among few others,  
317 cluster 14 (diamine acetyltransferases) in the stringent SSN.

318           NAA50, NAA60 and their surrounding clusters share a common ancestor with cluster 161 and  
319 the MSA of NAA50, NAA60 and sequences in cluster 161 shows many conserved key residues (**Fig**  
320 **s18**). Cluster 161 contains only sequences of *Caenorhabditis tropicalis* and is highly similar to both  
321 Naa50 and Naa60. It might therefore acetylate substrates similar to those acetylated by NAA50 and  
322 NAA60.

323           In Group 3 clusters 104, 222, 13 and 47 are close to NAA40 (ochre branches) (**Fig 5**).  
324 Additionally, clusters 111 and 176 share the same common ancestor with NAA40 and surrounding  
325 clusters (**Fig 5**). Sequences in Cluster 176 are annotated as NAA40. It is unclear whether cluster 111  
326 is also a NAA40 or if it has a different substrate specificity.

327           In Group 4 of NATs (dark blue branches), clusters 94, 106, 226 and 232 are close to NAA80  
328 (cluster 63) (**Fig 5**). These clusters share the same common ancestor. This group of sequences shares  
329 a common ancestor with cluster 32. Another branch, branching from the NAA80 branch contains  
330 clusters 14 (Diamine acetyltransferases), 15 and 53 (Tyramine N-feruloyl transferase 4/11). In

331 addition, on the same branch, but closer to clusters 14, 15 and 53 than to NAA80, lie uncharacterized  
332 clusters 29, 152 and 218. Clusters 29, 152 and 218 share a common ancestor, according to our tree,  
333 with cluster 68 (Histone acetyltransferase HPA2 (77)) and 194.

334 Histone acetyltransferase GCN5 (cluster 1) is found on the same branch as NAA40 on the  
335 phylogenetic tree and, also, close to NAA40 and NAA80 on the structure similarity dendrogram (**Fig**  
336 **4**). The MSA between NAA40 and acetyltransferases from cluster 1 shows some conservation  
337 between these two types of acetyltransferases, but none of the functional key residues for NAA40 are  
338 conserved in sequences from cluster 1 (**Fig s19**). Judging by the branching of our tree, NAA40 and  
339 NAA80 have evolved from, or together with, histone acetyltransferases (**Fig 5**). Indeed, these two  
340 NATs do not share any of the characteristics of Group 1 and Group 2 NATs. Their separate branching  
341 is in agreement with the assumptions we made about N-terminal acetyltransferases evolving more  
342 than once, which was based on the topology of our SSNs and on the sequence motif composition.

343

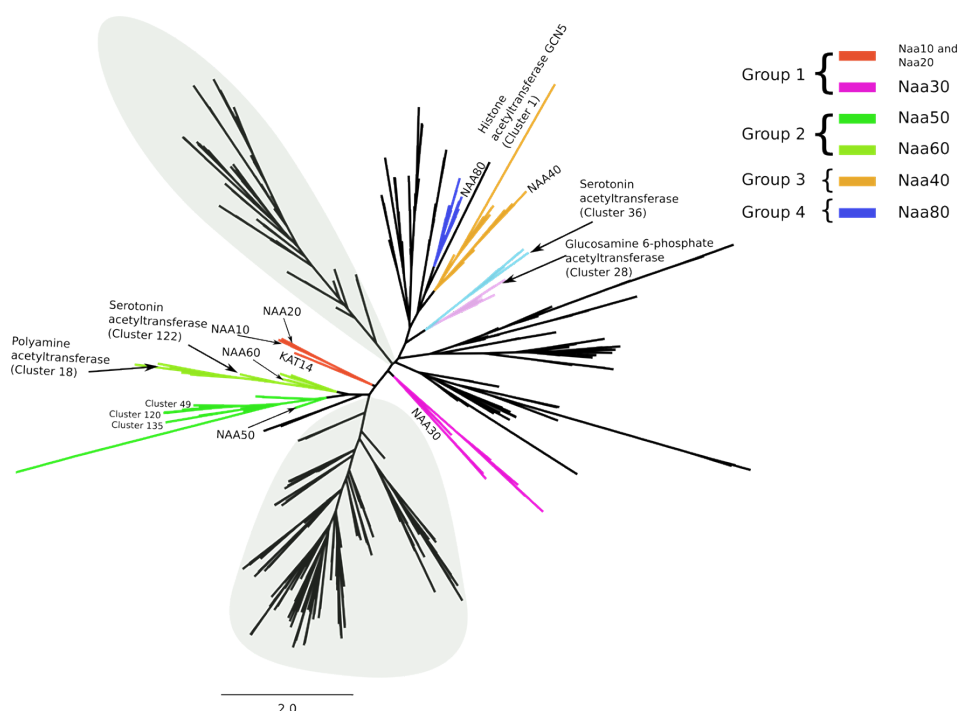

344

345 **Figure 5. Unrooted phylogenetic tree of the acetyltransferase superfamily.** The tree contains only  
346 those sequences for which we could find significant relationships in an SSN. According to the tree,  
347 Groups 1 and 2 are close to one another, as are Groups 3 (NAA40) and 4 (NAA80). A gray



348 background is used to highlight the branches on the tree that are populated exclusively by  
349 uncharacterized sequences, and for which we cannot infer functions based on our computational  
350 approach.

351

352

## 353 **5. Prediction of new acetyltransferases**

### 354 **5.1. Predictions based on SSN and sequence motifs**

355 The initial SSN (**Fig 2**) shows that there are clusters containing uncharacterized sequences  
356 around clusters of known NATs. We focused on those clusters, calculated their sequence motifs and  
357 compared them to motifs of known NATs (see Methods section). We are interested in finding proteins  
358 with sequences that are in the vicinity of known NATs in the SSN, and that display sequence motifs  
359 close to the NATs motifs reported in this work (**Fig 3**).

360 Around group 1, no neighboring cluster showed sequence motifs close to those found in clusters  
361 2 (NAA30), 8 (NAA20) and 10 (NAA10). Therefore, none of the connected clusters to either NAA10  
362 or NAA20 were considered as potential new NATs.

363 In group 2, clusters 9 (NAA50) and 24 (NAA60) belong to connected components that contain  
364 uncharacterized clusters numbered 49, 83, 120, 128, 135, 136, 209 and 212 (Cf. Figure 3). We found  
365 that all of these clusters, in addition to an isolated cluster numbered 207, have sequence motifs highly  
366 similar to the fingerprint of group 2 (**Fig s20**). Yet the motifs are not identical to those of NAA50 and  
367 NAA60. In the 6 clusters around cluster 9 (NAA50) (**Fig 2**), NAA50 is the only confirmed  
368 acetyltransferase and we found sequences annotated as NAA50 both in clusters 9 and 135. There are  
369 X-ray structures available for both of these clusters but proteomics and biochemical experiments have  
370 shown that they may differ in their substrate specificity (47,78). We observe a difference in sequence  
371 motifs; a mutation-sensitive phenylalanine (43) in the  $\alpha 1$ - $\alpha 2$  loop of NAA50 (first Phe in the motif  
372 of group 2 shown on Fig.4) is replaced by a less bulky leucine in sequences from cluster 135 (**Fig 6A**  
373 **and 6C**). We observe the same differences in the  $\alpha 1$ - $\alpha 2$  loop between cluster 9 (NAA50) and

374 uncharacterized clusters 49, 120, 128 and 212 (**Fig 6A**). Two residues downstream from the  
375 leucine/phenylalanine substitution, we observe a conserved isoleucine in cluster 120 instead of a  
376 highly conserved valine in NAA50. This valine forms van der Waals contacts with the substrate in  
377 NAA50 (43) and is, thus, important for substrate binding. Moreover, the  $\alpha 1$ - $\alpha 2$  loop in cluster 120  
378 sequences contains two conserved prolines (**Fig 6A**) unlike NAA50 that contains only one (**Fig**  
379 **3**). The characteristic  $\beta 6$ - $\beta 7$  motif of NAA50 (**Cf Table 1 and Fig 3**) is not present in cluster 135,  
380 which doesn't have the conserved tyrosine in this loop (second tyrosine of the sequence motif on **Fig**  
381 **3**). Structurally, the differences between cluster 9 (NAA50) and cluster 135 enzymes are precisely in  
382 the  $\beta 6$ - $\beta 7$  loop, which is longer in cluster 135 structure (**Fig s21**). Sequences from all other clusters,  
383 found clustering around cluster 9, carry the same  $\beta 6$ - $\beta 7$  loop motif as NAA50 (**Fig 6A**). Finally, there  
384 are differences in sequence motifs carried by the  $\beta 4$  strand; the methionine responsible for interacting  
385 with the substrate in NAA50 (third position in  $\beta 4$  motif on Fig 4) is substituted by a glutamine in  
386 clusters 49 and 128 and by a glutamate in clusters 135 and 136, while sequences in cluster 212 retain  
387 the conserved methionine. Based on the presented differences we predict that clusters 49, 120, 128,  
388 136, and 212 have substrate specificities different from that of NAA50.

389 We predict that the position of clusters 83 and 209 around NAA60 (**Fig 2**) reflects different  
390 substrate specificities, as well. The main difference between clusters 83 and 209 and cluster 24  
391 (NAA60) is in the  $\alpha 1$ - $\alpha 2$  loop. While the mutation-sensitive phenylalanine is present in clusters 83  
392 and 209 (**Fig 6A**) there is a difference four residues downstream of it; where the NAA60 sequence  
393 contains a conserved acidic residue, sequences in clusters 83 and 209 have a conserved positively  
394 charged residue (**Fig 6A**). Given the importance of the  $\alpha 1$ - $\alpha 2$  loop (43–45,48) we predict that such a  
395 drastic change will result in proteins belonging to clusters 83 and 209 having a ligand specificity that  
396 differs from that of NAA60.

397

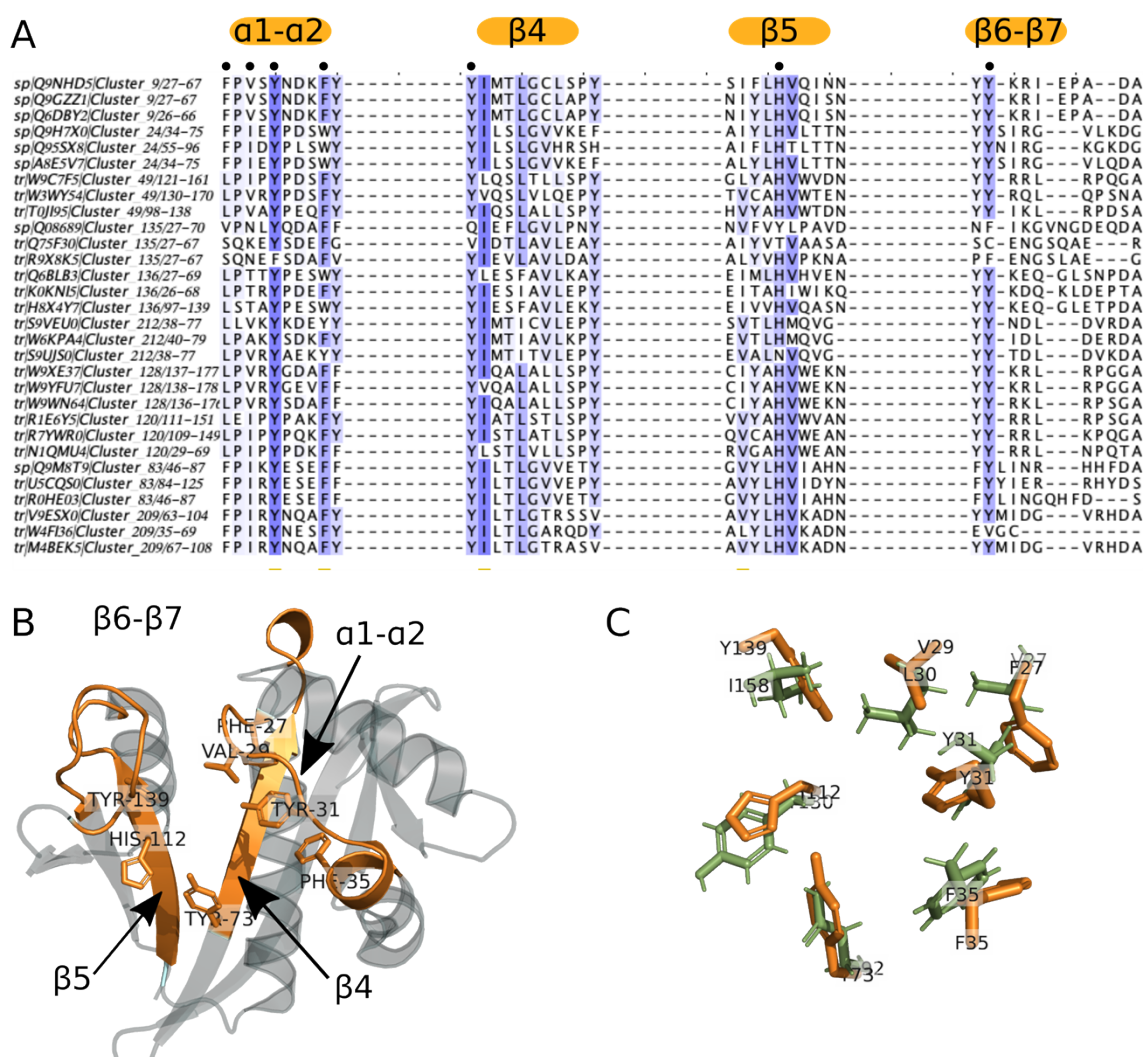

398

399 **Figure 6. Variations of sequence motifs in key positions on the GNAT fold suggest novel NATs**  
 400 **with different ligand specificities.** When we compare the sequence motifs of NAA50 (cluster 9) and  
 401 NAA60 (cluster 24) to the corresponding motifs of their surrounding clusters, we notice a number of  
 402 small but meaningful differences (A). These differences occur on key positions of the GNAT fold  
 403 and are illustrated here on the X-ray structure of NAA50 (PDB 3TFY) (B) The sequence differences  
 404 located on the  $\alpha 1-\alpha 2$  loop,  $\beta 4$  and  $\beta 5$  strands and  $\beta 6-\beta 7$  loop residues are likely to result in altered  
 405 specificity. The structure superimposition between human NAA50 from cluster 9 (orange, PDB  
 406 3TFY) and yeast NAA50 from cluster 135 (green, PDB 4XNH) highlights the small differences  
 407 between residues involved in substrate binding in these two proteins with reportedly different  
 408 specificities (78) (C).

409

410 We applied the same strategy as above to predict the specificity of clusters surrounding the NAA40  
411 cluster (cluster 20) (**Fig 2**). Some of the NatD residues have been shown to be essential for substrate  
412 binding. These residues (Y136 – in  $\beta$ 4, Y138 – in  $\beta$ 4, D127 – in  $\beta$ 3 and E129 between  $\beta$ 3 and  $\beta$ 4 in  
413 human NatD) are involved in interaction with the first 4 residues of the NatD substrate (H4 and H2A  
414 histones) and their mutation greatly reduces the catalysis rate (49). We show that some of these  
415 essential residues are not conserved in sequences from clusters surrounding the NatD cluster (**Fig**  
416 **s22**). This raises the question of the type of substrate acetylated by enzymes from these clusters and  
417 whether these enzymes are pseudoenzymes, given that mutated residues have been shown to be  
418 essential for NAA40 substrate recognition and catalysis (49). Sequences in clusters 13, 104 and 222  
419 do not have the conserved aspartate on  $\beta$ 3, while clusters 13, 47 and 222 do not have a tryptophan in  
420 the  $\alpha$ 1- $\alpha$ 2 loop (**Fig s22**). Both of the missing residues are crucial for substrate binding, which could  
421 mean that clusters 12, 97, 223 and 47 could bind and acetylate different substrates. We could not find  
422 any other clusters from this group that share NatD motifs.

423 Even though there are four clusters around NAA80 (cluster 63, group 4) (**Fig 2**), we did not  
424 find any variations in their key sequence motifs (**Fig s23**). The clustering in this case was likely based  
425 on taxonomical differences.

426

## 427 **5.2. Experimental verification of clusters 49 and 120**

428 To evaluate the accuracy of our predictions, we recombinantly expressed two candidates from  
429 the clusters 49 and 120, purified them and tested their ability to acetylate N termini from a selection  
430 of 24 amino acids-long synthetic peptides (**Fig 7**). One of the candidate enzymes was N1Q410 from  
431 the fungus *Dothistroma septosporum*. After expression and subsequent purification of N1Q410 (**Fig**  
432 **s24A and s24B**), we tested its ability to acetylate N-termini of different sequences in a DTNB-based  
433 spectrophotometric assay (**Fig 7A**). The first seven peptides represent typical substrates for the seven  
434 known NATs in higher eukaryotes (NatA, SESS; NatB, MDEL; NatC, MLPG; NatD, SGRG; NatE,  
435 MLGP; NatF, MLGP; NatH, DDDI) (7,30). The subsequent six peptides have been selected

436 dependent on the initial results for both proteins, resembling amino acid combinations that are  
 437 potential substrates. Although the overall activity of N1Q410 was relatively low, there was a clear  
 438 preference for methionine starting peptides, especially MDEL ( $21.09 \pm 4.03 \mu\text{M}$ ) and MEEE ( $15.10$   
 439  $\pm 0.25 \mu\text{M}$ ) (Fig 7A). The putative NAT A0A194XTA9 from the fungus *Phialocephala scopiformis*  
 440 (Fig s24C and Fig s24D) showed a higher activity in general as well as a broader substrate specificity  
 441 (Fig 7B). Similar to N1Q410 only peptides starting with a methionine were Nt-acetylated by  
 442 A0A194XTA9, with the peptides MAPL ( $50.92 \pm 1.89 \mu\text{M}$ ), MFGP ( $48.94 \pm 2.50 \mu\text{M}$ ) and MVEL  
 443 ( $148.74 \pm 2.25 \mu\text{M}$ ) showing the highest activities.

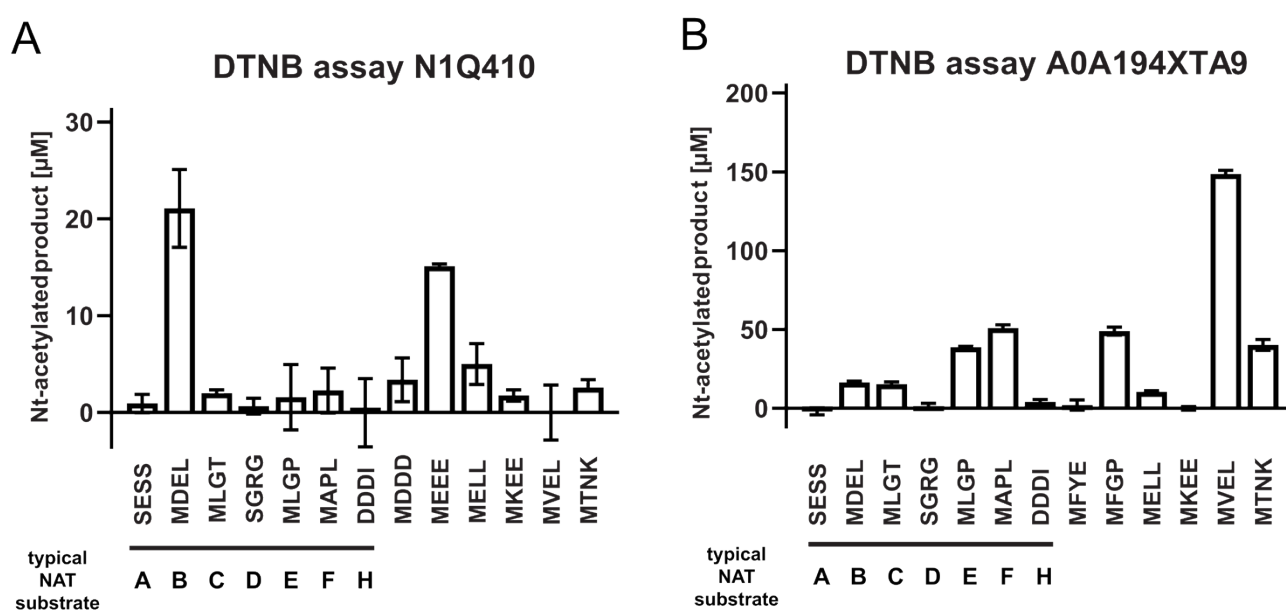

444

445 **Figure 7. Purification and DTNB-based activity assays of the putative NATs N1Q410 and**  
 446 **A0A194XTA9.** Putative NAT activities were tested by DTNB-based assays.  $3\mu\text{M}$  of purified  
 447 N1Q410 (A) and A0A194XTA9 (B) were incubated with a selection of 24 amino acids-long synthetic  
 448 peptides ( $300 \mu\text{M}$ ), and Ac-CoA ( $300 \mu\text{M}$ ) for 1 hour at  $37^\circ\text{C}$ . The formation of Nt-acetylated product  
 449 was spectrophotometrically determined. Shown is the mean  $\pm$  SD ( $n = 3$ ).

450

451 **Discussion**

452 Using pairwise sequence comparisons and phylogenetic analyses we have mapped the sequence  
453 space of the eukaryotic N-terminal acetyltransferases superfamily and the evolutionary relationship  
454 between its members.

455

456 **High diversity in the acetyltransferase superfamily.** We first sketched the topology of the  
457 entire acetyltransferase superfamily in the form of a sequence similarity network (SSN). The size and  
458 topology of the network, with a large number of single isolated clusters, reveals the high diversity of  
459 the acetyltransferase superfamily. Numerous clusters contain only uncharacterized sequences, but  
460 many contain at least one defined and annotated sequence. Inside these clusters we transferred  
461 annotation from known to uncharacterized sequences and we could observe that N-terminal  
462 acetyltransferases are found in different parts of the network. Using information from the network  
463 topology together with the identification of sequence motifs for each of the known NATs, we could  
464 classify NATs into 5 different groups.

465

466 **NAA10, NAA20, NAA30, NAA50 and NAA60 share a common ancestor.** Group 1 of NATs  
467 contains NAA10, NAA20 and NAA30. Sequence motifs on  $\alpha 1$ - $\alpha 2$  loop,  $\beta 4$  and  $\beta 5$  strands and  $\beta 6$ - $\beta 7$   
468 loop are characteristic to this group and represent its signature. Protein N-termini starting with a small  
469 residue, which is exposed after removing of initial methionine, and protein termini with the initial  
470 methionine can be acetylated by this group of NATs (7). Even though these enzymes are obviously  
471 closely related, they employ different solutions to bind and acetylate substrates. Slight changes are  
472 sufficient to shift the substrate specificity of the GNAT fold. The same GNAT elements in Group 2  
473 of NATs, which contains NAA50 and NAA60, are important for substrate binding and catalysis  
474 (43,44). Group 2 NATs acetylate protein N-termini starting with a methionine (43,44). Large  
475 differences between Group 1 and Group 2 exist in the way the substrate binds to the enzyme and also  
476 the position of the catalytic residue on the fold. The difference in catalytic strategy between Group 1  
477 and Group 2 enzymes can be illustrated by drawing a horizontal line through the middle of the V-

478 shaped splay across the  $\beta$ 4 and  $\beta$ 5 strands (Cf Fig.1); in Group 1 the active site would be above the  
479 line, while it would be below the line in Group 2. Interestingly, catalytic residues of Group 2 are  
480 conserved in Group 1, but they are not catalytically active in Group 1 (48). The two groups share two  
481 conserved tyrosines in each of the  $\beta$ 6- $\beta$ 7 and  $\alpha$ 1- $\alpha$ 2 loop. Both are involved in substrate binding. In  
482 Group 1 of NATs, residues at positions upstream of the mentioned tyrosine (positions -2 and -4 with  
483 respect to the Tyr) are also involved in substrate binding, but the same positions in Group 2 do not  
484 seem to be as important for binding the substrate, even though position -4 shows mutational  
485 sensitivity (45). Our phylogenetic tree supports earlier suggestions that NATs from Groups 1 and 2  
486 share a common ancestor. An archaeal N-terminal acetyltransferase, whose structure was solved by  
487 Liszczak and Marmorstein (72), can acetylate substrates of both NAA10 and NAA50. The archaeal  
488 enzyme employs catalytic strategies from both of these enzymes. It is most likely, as the authors  
489 suggested, that NAA10 and NAA50 evolved from this common ancestor. Common ancestry is also  
490 supported by the conserved sequence motifs which interestingly do not all necessarily retain a  
491 significant functional role in each of the NAT groups. A less stringent SSN also shows closer  
492 clustering of the Group 1 and Group 2 NATs.

493

494 **Large evolutionary distance between NAA40 and NAA80 on one hand, and the other**  
495 **NATs on the other hand.** Group 3 contains NAA40, the NAT with the specificity towards the histone  
496 H4 and H2A N-termini (sequence: SGRG) (49). The first major difference between NAA40 and  
497 Group 1 and 2 NATs is the fact that the  $\beta$ 6- $\beta$ 7 loop in NAA40 has no role in determining substrate  
498 specificity (49) and does not carry an invariable tyrosine. While the  $\alpha$ 1- $\alpha$ 2 loop of NAA40 plays a  
499 role in substrate binding (49), just like in groups 1 and 2 of NATs, it has a different position in the  
500 3D structure and its sequence motif does not bear any resemblance with the conserved motifs of  
501 groups 1 and 2. Our SSNs and phylogenetic tree all show a large evolutionary distance between Group  
502 3 and Groups 1 and 2.

503           Group 4 is defined by NAA80, the most recently discovered N-terminal acetyltransferase (30).  
504   The  $\beta$ 6- $\beta$ 7 loop of NAA80 is not conserved and does not play an important role in acetylation. As in  
505   most other NATs the  $\alpha$ 1- $\alpha$ 2 loop plays an important role in substrate binding and is well conserved  
506   (50). The  $\alpha$ 1- $\alpha$ 2 loop sequence motif is different from those of other NATs. Moreover, NAA80 has a  
507   wider substrate binding groove between the  $\alpha$ 1- $\alpha$ 2 and  $\beta$ 6- $\beta$ 7 loops. This structural feature supports  
508   classifying NAA80 into a different NAT type. In addition NAA80 does not have the  $\alpha$ 1- $\alpha$ 2 and  $\beta$ 6-  
509    $\beta$ 7 tyrosines found in Groups 1 and 2. Our results confirm, over a larger set of sequences, an  
510   observation that has been reported earlier (50).

511

512           **Different evolutionary paths.** Each of the NAT groups have clear characteristics that  
513   distinguish them unequivocally from one another. This observation indicates different evolutionary  
514   paths for NATs, and not divergent evolution. Our results indicate that N-terminal acetyltransferases  
515   evolved more than once on the GNAT fold. The phylogenetic tree which informs on the position of  
516   the different NATs in the acetyltransferase superfamily and provides a useful perspective on the  
517   evolution of ligand specificities, confirms this. The relationships between enzymes revealed by the  
518   SSNs and the structural comparison are also in agreement with the phylogenetic tree. Interestingly  
519   Groups 1 and 2 are located on the same branches as acetyltransferases known to have other functions.  
520   The histone acetyltransferase KAT14 is close to Group 1 and serotonin acetyltransferases (AANAT)  
521   are close to Group 2. Those are all present in the human proteome. Histone acetyltransferases KAT2A  
522   and KAT2B and diamine acetyltransferases are on the same branch of the phylogenetic tree as  
523   NAA40 and NAA80. Glucosamine 6-phosphate acetyltransferases are quite close to NAA40 and  
524   NAA80 branches as well. Groups 3 and 4 are also found to share a common ancestor in the  
525   phylogenetic tree and they are found to be closely related based on structure similarity. Furthermore,  
526   serotonin acetyltransferase from cluster 122 lies on the same branch as NAA60 and is also shown to  
527   be close to the NAA60 structure in the structure similarity dendrogram (**Fig 4**). N-terminal



528 acetyltransferases are not one homogenous, uniform, family of enzymes and the GNAT fold has  
529 evolved different specificities more than once.

530

531 **Consequences for function and functional annotation of acetyltransferases.** Because of this  
532 we cannot exclude that N-terminal acetyltransferases can acetylate other substrates than N-terminal  
533 amines. NAA10 and NAA60 are suspected to be able to acetylate lysine side chains in addition to  
534 protein N-termini (79,80), even if this has been debated (81). A related consequence is that other  
535 acetyltransferases might be able to acetylate N-terminal amino acids. One of the most recent findings  
536 is that glucosamine 6-phosphate acetyltransferases can acetylate protein N-termini (52). Moreover,  
537 our results indicate that serotonin acetyltransferases could have the ability to acetylate protein N-  
538 termini and have a biological role as N-terminal acetyltransferases, as well. This is relevant in the  
539 quest and characterization of yet-to-be discovered enzymes catalyzing N-terminal acetylation of  
540 particular groups of protein N-termini (for instance those resulting from post-translational protease  
541 action) or specific proteins (analog to NAA80 specifically acetylating actins). Indeed, the currently  
542 known NATs are not yet defined as responsible for all cellular N-terminal acetylation events though  
543 the major classes of co-translational acetylation have been accounted for using *S. cerevisiae* genetics  
544 and proteomics (11,35,41). In the human proteome we could not find uncharacterized sequences  
545 qualifying as NATs as per the characteristics we define in this study. It is therefore important to  
546 thoroughly inspect all close relatives to known NATs for the discovery of new enzymes.

547 The fact that there is not one single catalytic site and mechanism for acetylation even for the  
548 closest of NATs creates another conundrum. NAA10, for example, has a conserved glutamate in  $\alpha 1$ -  
549  $\alpha 2$  loop which is involved in catalysis, but in the case of NAA20, NAA10's closest relative, the same  
550 conserved glutamate has no role in catalysis (45,48). This case became even more puzzling when the  
551 study of NAA20 revealed no obvious catalytic residue. Furthermore, NAA10 acetylates different  
552 substrate N-termini when in a monomeric form as compared to when it is complexed with its auxiliary  
553 subunit NAA15 (48,82). It can look as if as long as a substrate can bind properly to the GNAT, the

554 chances are high it can be acetylated. It follows that the impossibility to strictly define what makes  
555 N-terminal acetyltransferases acetylate N-termini and no other substrates greatly limits our ability to  
556 predict NAT function from sequence. We are left to only comparing key sequence motifs in order to  
557 detect similarities and predict NAT function. Yet, subtle sequence changes might also affect substrate  
558 specificity. Despite those difficulties we were able, using this approach, to predict two new NATs  
559 and confirm their function by acetylation assays *in vitro*.

560

561 **Using the classification for functional annotation of uncharacterized sequences.**

562 Representatives from the clusters 49 and 120 from Group 2 (Figure 2), N1Q410 from the fungus *D.*  
563 *septosporum* and A0A194XTA9 from the fungus *P. scopiformis* were expressed, purified and  
564 subjected to *in vitro* NAT assays. Group 2 also harbors clusters 9 and 24 containing known NATs  
565 NAA50 and NAA60, respectively. Thus, we would expect that proteins from other Group 2 clusters  
566 would express NAT-activity and further that these display a substrate specificity similar to what is  
567 observed for NAA50 and NAA60. NAA50 and NAA60 have overlapping substrate specificities *in*  
568 *vitro*, but *in vivo* substrates are not likely to overlap since NAA50 is nuclear/cytosolic and partly  
569 anchored to the ribosome via NAA15-NAA10 (83,84) while NAA60 acetylates transmembrane  
570 proteins via anchoring to the cytosolic side of the Golgi-membrane and other cellular membranes  
571 (27,85). Both enzymes may acetylate a variety of Met-starting N-termini, in particular Met-Leu, Met-  
572 Ala, Met-Val, Met-Lys, Met-Met (40,82). Both N1Q410 and A0A194XTA9 display clear N-terminal  
573 acetyltransferase activity confirming that these are true NATs (**Fig 7**). Furthermore, both enzymes  
574 prefer Met-starting N-termini among the peptides tested. A0A194XTA9 has a clear preference for  
575 the NatE/NatF (NAA50/NAA60) type of substrates strongly suggesting that this NAT is either a  
576 NAA50 or NAA60 type of enzyme in *P. scopiformis*. For N1Q410, we observe a preference for N-  
577 terminal peptides where Met is followed by an acidic residue at the second position, very similar to  
578 NAA20/NatB activity (41) despite the fact that it harbours sequence motifs highly similar to those of  
579 Group 2 NATs. This is an example of how sensitive N-acetyltransferase ligand specificity can be to

580 subtle sequence changes. In this case they mainly consist in: (1) two substitutions in the  $\alpha 1$ - $\alpha 2$  loop  
581 where the highly conserved F and V in the of NAA50 motif are replaced by an L and an I, respectively,  
582 (2) NAA50 has only one proline in the  $\alpha 1$ - $\alpha 2$  loop while cluster 120 has 2 and (3) the highly conserved  
583 M in the  $\beta 4$  strand of NAA50 is at a different position in cluster 120 sequences. Thus, N1Q410 might  
584 be a NAA20 type enzyme which is clustered among NAA50/NAA60 type enzymes in Group 2, or  
585 there might be other factors skewing the substrate preference *in vitro*.

586 The superfamily has highly diverged in primary structure, but secondary and tertiary structures  
587 remain largely intact. The GNAT is the scaffold on which numerous types of molecules can get  
588 acetylated and it evolves different specificities by changes in sequence that do not affect the overall  
589 structure. Our work shows that it is possible, within the limits discussed in “Consequences for  
590 function and functional annotation of acetyltransferases”, to predict ligand specificity similarity or  
591 differences between GNAT-containing sequences if they are closely related and by comparing the  
592 key sequence motifs that we report here. Predicting the substrate specificity of an uncharacterized  
593 GNAT sequence which doesn't have close relatives with known function is practically impossible *in*  
594 *silico*. *In vitro* assays are necessary to map function and specificity of uncharacterized parts of the  
595 acetyltransferase superfamily. It is important to note that large portions of the phylogenetic tree have  
596 exclusively uncharacterized sequences and it is impossible to say anything about their substrate  
597 specificity. There are no human proteins in the uncharacterized parts of the tree. While this work is  
598 restricted to eukaryotic GNAT-containing sequences and encompasses the majority of eukaryotic  
599 acetyltransferases it is important to mention that some non-GNAT acetyltransferases like FrBf (86)  
600 were discovered as recently as in 2011. Members of the MYST family (87) are also relevant non-  
601 GNAT acetyltransferases. New potential acetyltransferases could be found among those enzymes.  
602 Moreover recent studies have shown that most N-terminal acetyltransferases evolved before  
603 eukaryotic cells (46) so it might be that looking at bacterial and archaeal proteomes would provide  
604 valuable information.

605

606           In summary our work provides the first classification and phylogenetic analysis of the  
607 eukaryotic GNAT acetyltransferases superfamily. It reveals that NATs evolved more than once on  
608 the GNAT fold and that they do not form a homogenous family. We provide sequence motif  
609 signatures of known NATs that, together with this classification form a solid basis for functional  
610 annotation and discovery of new NATs.

611

612

## 613 **Material and methods**

### 614 **Sequence similarity networks (SSN)**

615 *Collection of sequence dataset.* All members of GCN5-related acetyltransferase superfamily  
616 contain the GNAT fold. As there is no finer classification to aid dataset creation, we retrieved all  
617 UniProt sequences that match the GNAT fold signature as defined by PROSITE (54,88). According  
618 to PROSITE there are four types of GNAT fold – GNAT (code: PS51186), GNAT\_ATAT (code:  
619 PS51730), GNAT\_NAGS (code: PS51731) and GNAT\_YJDJ (code: PS51729). These PROSITE  
620 signatures match sequences from all domains of life (around 900 000 sequences in UniProt). We  
621 restricted our dataset to only eukaryotic entries (more than 50000 sequences) in agreement with the  
622 focus of this work. We kept all SwissProt (manually curated) sequences and *Homo sapiens* TrEMBL  
623 (not reviewed) sequences in the dataset. The remaining TrEMBL sequences were filtered to reduce  
624 the size of the dataset. Filtering of TrEMBL sequences was performed using h-cd-hit (60,89) in three  
625 steps – a first run performed at 90% identity, a second at 80% and a third at 70% identity. The  
626 threshold was set to be 70% sequence identity as this usually indicates shared function. We created  
627 two datasets using this strategy: the full-sequence dataset and the GNAT-domain dataset. We used  
628 the pfamscan tool from Pfam (90) together with HMMER3.2.1 (91) to locate the GNAT fold  
629 boundaries in the full-sequence dataset in order to generate the GNAT-domain dataset.

630 *Generating the SSNs.* The final, filtered, dataset (14396 sequences) was used to generate the SSN  
631 using EFI-EST (61) with the following parameters: E-value of  $10^{-15}$  and alignment score of 30. The  
632 chosen values ensured that sequences clustering together were closely related (Cf. Fig.S1) with a  
633 minimal sequence identity equal to of 40% on average yielding isofunctional clusters. The shortest  
634 sequence kept in the network was 34 amino acids long. It is not known yet what the minimal  
635 functional part of the GNAT fold is. The resulting network was analyzed using Cytoscape (63). To  
636 visualize the network in Cytoscape we used  $\gamma$ files organic algorithm by  $\gamma$ Works  
637 (<https://www.yworks.com/>). In addition to the network made from E-value thresholds equal to  $10^{-15}$   
638 and alignment score equal to 30 we created several other networks, mainly for the purpose of finding

639 the best dataset for phylogenetic analyses (see Phylogeny section below for more details). Parameters  
640 for these networks were: for E-value of  $10^{-5}$ , alignment scores of 15, 20, 25, 30, 35 or 40; for E-value  
641 of  $10^{-10}$ , alignment scores of 15, 20, 25, 30, 35 or 40; for E-value of  $10^{-15}$ , alignment score 16, 25, 30,  
642 35 or 40; for E-value equal to  $10^{-20}$ , alignment score equal to 20, 30, 35 or 40.

643 *Identification of isofunctional clusters and their neighbours.* In the resulting SSN (E-value  $10^{-15}$   
644 and alignment score 30) there were no clear boundaries between different clusters. In order to identify  
645 separate clusters, we applied the clusterONE algorithm (62) which is designed to recognize dense  
646 and overlapping regions in a graph. The search for dense regions in a network (clusters) was  
647 performed with the following parameters: minimum size of 10 sequences for a cluster to be  
648 considered, minimum density: auto, edge weights: percentage identity, and the remaining settings  
649 were taken as their default values. Next, we identified known NATs, and other non-NAT  
650 acetyltransferases, in their corresponding clusters (using annotation details added to the network) and  
651 we let these clusters be defined by experimentally confirmed enzymes (based on the assumption of  
652 cluster isofunctionality). Given the high percentage identity inside the identified clusters, we assumed  
653 cluster isofunctionality (i.e. similar ligand specificity) and transferred annotation from experimentally  
654 confirmed proteins to unknown ones within the same cluster. We also created a simplified network  
655 using the clusterONE results as input. We represented each cluster by defined ClusterONE as a single  
656 node. Nodes in the simplified network are connected by an edge if at least one edge exists between  
657 nodes of two given clusters in the original network. After adding all nodes and edges to the simplified  
658 network, we applied  $\gamma$ Files (<https://www.yworks.com/>) orthogonal algorithm to get the final view.

659 *Network analyses.* The topology of the simplified network was analyzed using Network Analyzer  
660 through Cytoscape. Mainly, we used node degree and betweenness centrality, where node degree tells  
661 how many neighbors a node has and betweenness centrality describes how important is a given node  
662 for interactions between different parts of a network. Network analyzer calculates betweenness  
663 centrality using algorithm by Brandes (92).

664 *Motif discovery.* We used the MEME tool (64) to find characteristic sequence motifs within  
665 clusters. Each motif search was performed on all sequences of a given cluster. Enriched motifs were  
666 discovered relative to a random model based on frequencies of letters in the supplied set of sequences.  
667 As we work with protein sequences zero to one occurrence of each motif per sequence was expected  
668 and searched for. A maximum of 25 unique motifs were searched for per sequence set, with 5 to 10  
669 amino acid width. Only motifs with e-value below 1 were taken onto account.

670

### 671 **Prediction of NATs among uncharacterized sequences**

672 The prediction of NATs among uncharacterized sequences in the SSN started by the selection  
673 of the 29 clusters (cluster numbers: 227, 3, 121, 42, 62, 36, 82, 40, 114, 25, 223, 168, 135, 136, 212,  
674 128, 49, 120, 83, 209, 106, 232, 104, 226, 104, 13, 222, 46, 47) neighboring the clusters containing  
675 known NATs, namely clusters 10 (NAA10), 8 (NAA20), 2 (NAA30), 20 (NAA40), 9 (NAA50) 24  
676 (NAA60), 97 (NAA70) and 63 (NAA80). We searched for occurrences of key sequence motifs of  
677 known NATs (shown in Figure 4 of the Results section) in all sequences of the 29 selected clusters  
678 using MAST (93). When we found in a cluster sequence motif similar to that of a cluster of a known  
679 NAT, we generated a MSA using three random sequences from the identified cluster and three  
680 sequences from the cluster of known NAT.

681

### 682 **Phylogeny**

683 *Choice of sequence dataset for phylogeny.* Since there are no clear boundaries between different  
684 acetyltransferases, due to lack of detailed classification, we based our phylogeny analysis on our  
685 SSNs. We used the more stringent SSN (E-value =  $10^{-15}$ , alignment score = 30) and selected three  
686 representative sequences for each cluster. In order to create the dataset for phylogenetic analyses, we  
687 created several networks that allowed for more connections between nodes (and clusters) (see **Table**  
688 **s1**) and looked for the SSN with the largest single connected component (the largest group of clusters)

689 exhibiting smallworld properties (94). We calculated smallworldness for each of the largest  
690 connected components using NetworkX Python library (95).

691 *Sequence alignment for phylogeny.* We selected three sequences per cluster to generate the  
692 multiple sequence alignment. If a cluster contained sequences from SwissProt, those sequences were  
693 used in the alignment. Otherwise, TrEMBL sequences were randomly selected as cluster  
694 representatives. As sequence divergence within the acetyltransferase superfamily is extremely high,  
695 we used only the highly conserved A and B motifs of the GNAT fold. The alignment was generated  
696 using Clustal Omega (96) and the full alignment was constructed step by step. Sequences from closely  
697 related clusters were aligned first and different alignments were then merged using MAFT (97).  
698 Merging two alignments using MAFT was always performed using “anchor” sequences and ensuring  
699 that both alignments had one set of five sequences (i.e. one cluster) in common (“anchor” sequences).  
700 That also ensured that corresponding secondary structure elements was kept intact after merging.  
701 Alignments generated for merging were manually edited, using acetyltransferases with known  
702 structures used as reference to increase the alignment precision.

703 *Model of evolution.* To select the right amino acid replacement model, which describes the  
704 probabilities of amino acid change in the sequence, we used ProtTest3 (98). As input, we used the  
705 previously generated multiple sequence alignment. Tested substitution model matrices were JTT (99),  
706 LG (100), DCMut (101), Dayhoff (102), WAG (103) and VT (104). All rate variations were included  
707 in the calculation (allowing proportion of invariable sites or +I (105), discrete gamma model or +G  
708 (106) (with 4 rate categories) and a combination of invariable sites and discrete gamma model or  
709 +I+G (107). Empirical amino acid frequencies were used. We calculated a maximum likelihood tree  
710 to be used as starting topology.

711 *Construction and evaluation of the phylogenetic tree.* Finally, a maximum likelihood tree was  
712 calculated using RAxML (108) based on the generated alignment. We used LG+G+F model of  
713 evolution since it provided the best fit according to prottest3 (98) calculation (with AIC, AICc and  
714 BIC models selection strategies). Ten searches for the best tree were conducted. The tree was not



715 rooted. Once the best tree was calculated, its robustness was assessed using bootstrap. As stop  
716 criterion we used a frequency-based criterion, by calculating the Pearson's correlation coefficient  
717 (109). After bootstrapping was complete, we used transfer bootstrap expectation (TBE) (110) which  
718 has been shown to be more informative than Felsenstein's bootstrap method for larger trees built with  
719 less similar sequences.

720

## 721 **Experimental**

722 A detailed description of the material and methods is provided in *Supplementary Information*. In  
723 brief, the genes *NIQ410* and *A0A194XTA9* were cloned into pETM11 vectors. The encoded proteins  
724 were recombinantly expressed in *E. coli* BL21 Star<sup>TM</sup> (DE3) cells and purified using affinity and size  
725 exclusion chromatography. The purity of the proteins was determined by SDS-PAGE and protein  
726 concentrations were determined spectrometrically. The enzyme activity was determined via DTNB  
727 assay as described in (111).

728

729 **Acknowledgements:** NR was supported by the Research Council of Norway (Projects 251247,  
730 288008). T.A was supported by the Research Council of Norway (Project 249843), the Norwegian  
731 Health Authorities of Western Norway (Project 912176), and the Norwegian Cancer Society.

732

## 733 **References:**

- 734 1. Drazic A, Myklebust LM, Ree R, Arnesen T. The world of protein acetylation. *Biochim*  
735 *Biophys Acta - Proteins Proteomics*. 2016 Oct;1864(10):1372–401.
- 736 2. Dyda F, Klein DC, Hickman AB. GCN5-related N-acetyltransferases: A structural overview.  
737 Vol. 29, *Annual Review of Biophysics and Biomolecular Structure*. 2000. p. 81–103.
- 738 3. Vetting MW, S. de Carvalho LP, Yu M, Hegde SS, Magnet S, Roderick SL, et al. Structure  
739 and functions of the GNAT superfamily of acetyltransferases. *Arch Biochem Biophys*.  
740 2005;433(1):212–26.

- 741 4. Yuan H, Marmorstein R. Histone acetyltransferases: Rising ancient counterparts to protein  
742 kinases. *Biopolymers*. 2013 Feb;99(2):98–111.
- 743 5. Glozak MA, Sengupta N, Zhang X, Seto E. Acetylation and deacetylation of non-histone  
744 proteins. *Gene* [Internet]. 2005;363:15–23. Available from:  
745 <http://www.sciencedirect.com/science/article/pii/S037811190500572X>
- 746 6. Marmorstein R, Trievel RC. Histone modifying enzymes: Structures, mechanisms, and  
747 specificities. *Biochim Biophys Acta - Gene Regul Mech*. 2009 Jan;1789(1):58–68.
- 748 7. Aksnes H, Drazic A, Marie M, Arnesen T. First Things First: Vital Protein Marks by N-  
749 Terminal Acetyltransferases. Vol. 41, *Trends in Biochemical Sciences*. Elsevier Ltd; 2016. p.  
750 746–60.
- 751 8. Coon SL, Weller JL, Korf H-W, Namboodiri MAA, Rollag M, Klein DC. cAMP Regulation  
752 of Arylalkylamine N -Acetyltransferase (AANAT, EC 2.3.1.87). *J Biol Chem*. 2001 Jun  
753 29;276(26):24097–107.
- 754 9. Wang J, Liu X, Liang YH, Li LF, Su XD. Acceptor substrate binding revealed by crystal  
755 structure of human glucosamine-6-phosphate N-acetyltransferase 1. *FEBS Lett*.  
756 2008;582(20):2973–8.
- 757 10. Lu L, Berkey KA, Casero RA. RGFSGS Is an Amino Acid Sequence Required for Acetyl  
758 Coenzyme A Binding and Activity of Human Spermidine/Spermine N 1 Acetyltransferase. *J*  
759 *Biol Chem*. 1996 Aug 2;271(31):18920–4.
- 760 11. Arnesen T, Van Damme P, Polevoda B, Helsens K, Evjenth R, Colaert N, et al. Proteomics  
761 analyses reveal the evolutionary conservation and divergence of N-terminal  
762 acetyltransferases from yeast and humans. *Proc Natl Acad Sci*. 2009 May 19;106(20):8157–  
763 62.
- 764 12. Starheim KK, Gevaert K, Arnesen T. Protein N-terminal acetyltransferases: when the start  
765 matters. *Trends Biochem Sci*. 2012 Apr 1;37(4):152–61.
- 766 13. Kamita M, Kimura Y, Ino Y, Kamp RM, Polevoda B, Sherman F, et al. N $\alpha$ -Acetylation of

- 767 yeast ribosomal proteins and its effect on protein synthesis. *J Proteomics*. 2011;74(4):431–  
768 41.
- 769 14. Kang L, Moriarty GM, Woods LA, Ashcroft AE, Radford SE, Baum J. N-terminal  
770 acetylation of  $\alpha$ -synuclein induces increased transient helical propensity and decreased  
771 aggregation rates in the intrinsically disordered monomer. *Protein Sci*. 2012;21(7):911–7.
- 772 15. Holmes WM, Mannakee BK, Gutenkunst RN, Serio TR. Loss of amino-terminal acetylation  
773 suppresses a prion phenotype by modulating global protein folding. *Nat Commun*. 2014 Sep  
774 15;5(1):4383.
- 775 16. Hwang C-S, Shemorry A, Varshavsky A. N-Terminal Acetylation of Cellular Proteins  
776 Creates Specific Degradation Signals. *Science (80- )*. 2010 Feb 19;327(5968):973–7.
- 777 17. Behnia R, Panic B, Whyte JRC, Munro S. Targeting of the Arf-like GTPase Arl3p to the  
778 Golgi requires N-terminal acetylation and the membrane protein Sys1p. *Nat Cell Biol*.  
779 2004;6(5):405–13.
- 780 18. Dikiy I, Eliezer D. N-terminal Acetylation stabilizes N-terminal Helicity in Lipid- and  
781 Micelle-bound  $\alpha$ -Synuclein and increases its affinity for Physiological Membranes. *J Biol*  
782 *Chem*. 2014;289(6):3652–65.
- 783 19. Forte GMA, Pool MR, Stirling CJ. N-Terminal Acetylation Inhibits Protein Targeting to the  
784 Endoplasmic Reticulum. Walter P, editor. *PLoS Biol*. 2011 May 31;9(5):e1001073.
- 785 20. Gromyko D, Arnesen T, Rynningen A, Varhaug JE, Lillehaug JR. Depletion of the human  
786 N $\alpha$ -terminal acetyltransferase A induces p53-dependent apoptosis and p53-independent  
787 growth inhibition. *Int J Cancer*. 2010;127(12):2777–89.
- 788 21. Pavlou D, Kirmizis A. Depletion of histone N-terminal-acetyltransferase Naa40 induces p53-  
789 independent apoptosis in colorectal cancer cells via the mitochondrial pathway. *Apoptosis*.  
790 2016;21(3):298–311.
- 791 22. Kalvik T V., Arnesen T. Protein N-terminal acetyltransferases in cancer. Vol. 32, *Oncogene*.  
792 2013. p. 269–76.

- 793 23. Cheng H, Dharmadhikari A V., Varland S, Ma N, Domingo D, Kleyner R, et al. Truncating  
794 Variants in NAA15 Are Associated with Variable Levels of Intellectual Disability, Autism  
795 Spectrum Disorder, and Congenital Anomalies. *Am J Hum Genet.* 2018 May;102(5):985–94.
- 796 24. Cheng H, Gottlieb L, Marchi E, Kleyner R, Bhardwaj P, Rope AF, et al. Phenotypic and  
797 biochemical analysis of an international cohort of individuals with variants in NAA10 and  
798 NAA15. *Hum Mol Genet.* 2019 Sep 1;28(17):2900–19.
- 799 25. Esmailpour T, Riazifar H, Liu L, Donkervoort S, Huang VH, Madaan S, et al. A splice donor  
800 mutation in NAA10 results in the dysregulation of the retinoic acid signalling pathway and  
801 causes Lenz microphthalmia syndrome. *J Med Genet.* 2014 Mar;51(3):185–96.
- 802 26. Myklebust LM, Van Damme P, Støve SI, Dörfel MJ, Abboud A, Kalvik T V, et al.  
803 Biochemical and cellular analysis of Ogden syndrome reveals downstream Nt-acetylation  
804 defects. *Hum Mol Genet.* 2014;24(7):1956–76.
- 805 27. Aksnes H, Van Damme P, Goris M, Starheim KK, Marie M, Støve SI, et al. An organellar  
806  $\alpha$ -acetyltransferase, naa60, acetylates cytosolic n termini of transmembrane proteins and  
807 maintains golgi integrity. *Cell Rep.* 2015;10(8):1362–74.
- 808 28. Arnesen T, Anderson D, Baldersheim C, Lanotte M, Varhaug JE, Lillehaug JR. Identification  
809 and characterization of the human ARD1-NATH protein acetyltransferase complex. *Biochem*  
810 *J.* 2005;386:433–43.
- 811 29. Dinh T V., Bienvenut W V., Linster E, Feldman-Salit A, Jung VA, Meinnel T, et al.  
812 Molecular identification and functional characterization of the first N $\alpha$ -acetyltransferase in  
813 plastids by global acetylome profiling. *Proteomics.* 2015;15(14):2426–35.
- 814 30. Drazic A, Aksnes H, Marie M, Boczkowska M, Varland S, Timmerman E, et al. NAA80 is  
815 actin's N-terminal acetyltransferase and regulates cytoskeleton assembly and cell motility.  
816 *Proc Natl Acad Sci U S A.* 2018;115(17):4399–404.
- 817 31. Evjenth R, Hole K, Karlsen OA, Ziegler M, Amesen T, Lillehaug JR. Human Naa50p  
818 (Nat5/San) displays both protein N $\alpha$ - and N $\epsilon$ -acetyltransferase activity. *J Biol Chem.*

- 819 2009;284(45):31122–9.
- 820 32. Hole K, Van Damme P, Dalva M, Aksnes H, Glomnes N, Varhaug JE, et al. The Human N-  
821 Alpha-Acetyltransferase 40 (hNaa40p/hNatD) Is Conserved from Yeast and N-Terminally  
822 Acetylates Histones H2A and H4. Imhof A, editor. PLoS One. 2011 Sep 15;6(9):e24713.
- 823 33. Mullen JR, Kayne PS, Moerschell RP, Tsunasawa S, Gribskov M, Colavito-Shepanski M, et  
824 al. Identification and characterization of genes and mutants for an N-terminal  
825 acetyltransferase from yeast. EMBO J. 1989;8(7):2067–75.
- 826 34. Park EC, Szostak JW. ARD1 and NAT1 proteins form a complex that has N-terminal  
827 acetyltransferase activity. EMBO J. 1992;11(6):2087–93.
- 828 35. Polevoda B. Identification and specificities of N-terminal acetyltransferases from  
829 *Saccharomyces cerevisiae*. EMBO J. 1999 Nov 1;18(21):6155–68.
- 830 36. Polevoda B, Sherman F. NatC N $\alpha$ -terminal Acetyltransferase of Yeast Contains Three  
831 Subunits, Mak3p, Mak10p, and Mak31p. J Biol Chem. 2001;276(23):20154–9.
- 832 37. Song OK, Wang X, Waterborg JH, Sternglanz R. An N $\alpha$ -acetyltransferase responsible for  
833 acetylation of the N-terminal residues of histones H4 and H2A. J Biol Chem.  
834 2003;278(40):38109–12.
- 835 38. Starheim KK, Gromyko D, Evjenth R, Rynningen A, Varhaug JE, Lillehaug JR, et al.  
836 Knockdown of human N alpha-terminal acetyltransferase complex C leads to p53-dependent  
837 apoptosis and aberrant human Arl8b localization. Mol Cell Biol. 2009;29(13):3569–81.
- 838 39. Terceros JC, Wickner RB. MAK3 Encodes an N-Acetyltransferase Whose Modification of  
839 the L-A. J Biol Chem. 1992;267(28):3–7.
- 840 40. Van Damme P, Hole K, Pimenta-Marques A, Helsens K, Vandekerckhove J, Martinho RG,  
841 et al. NatF Contributes to an Evolutionary Shift in Protein N-Terminal Acetylation and Is  
842 Important for Normal Chromosome Segregation. Snyder M, editor. PLoS Genet. 2011 Jul  
843 7;7(7):e1002169.
- 844 41. Van Damme P, Lasa M, Polevoda B, Gazquez C, Elosegui-Artola A, Kim DS, et al. N-

- 845 terminal acetylome analyses and functional insights of the N-terminal acetyltransferase NatB.  
846 Proc Natl Acad Sci. 2012 Jul 31;109(31):12449–54.
- 847 42. Wiame E, Tahay G, Tyteca D, Vertommen D, Stroobant V, Bommer GT, et al. NAT6  
848 acetylates the N-terminus of different forms of actin. FEBS J. 2018;285(17):3299–316.
- 849 43. Liszczak G, Arnesen T, Marmorsteins R. Structure of a ternary Naa50p (NAT5/SAN) N-  
850 terminal acetyltransferase complex reveals the molecular basis for substrate-specific  
851 acetylation. J Biol Chem. 2011;286(42):37002–10.
- 852 44. Støve SI, Magin RS, Foyn H, Haug BE, Marmorstein R, Arnesen T. Crystal Structure of the  
853 Golgi-Associated Human N $\alpha$ -Acetyltransferase 60 Reveals the Molecular Determinants for  
854 Substrate-Specific Acetylation. Structure. 2016 Jul;24(7):1044–56.
- 855 45. Hong H, Cai Y, Zhang S, Ding H, Wang H, Han A. Molecular Basis of Substrate Specific  
856 Acetylation by N-Terminal Acetyltransferase NatB. Structure. 2017;25(4):641-649.e3.
- 857 46. Rathore OS, Faustino A, Prudêncio P, Van Damme P, Cox CJ, Martinho RG. Absence of N-  
858 terminal acetyltransferase diversification during evolution of eukaryotic organisms. Sci Rep.  
859 2016;6(January):1–13.
- 860 47. Deng S, Magin RS, Wei X, Pan B, Petersson EJ, Marmorstein R. Structure and Mechanism  
861 of Acetylation by the N-Terminal Dual Enzyme NatA/Naa50 Complex. Structure. 2019 Jul  
862 2;27(7):1057-1070.e4.
- 863 48. Liszczak G, Goldberg JM, Foyn H, Petersson EJ, Arnesen T, Marmorstein R. Molecular  
864 basis for N-terminal acetylation by the heterodimeric NatA complex. Nat Struct Mol Biol.  
865 2013 Sep 4;20(9):1098–105.
- 866 49. Magin RS, Liszczak GP, Marmorstein R. The Molecular Basis for Histone H4- and H2A-  
867 Specific Amino-Terminal Acetylation by NatD. Structure. 2015 Feb;23(2):332–41.
- 868 50. Goris M, Magin RS, Foyn H, Myklebust LM, Varland S, Ree R, et al. Structural  
869 determinants and cellular environment define processed actin as the sole substrate of the N-  
870 terminal acetyltransferase NAA80. Proc Natl Acad Sci. 2018 Apr 24;115(17):4405–10.

- 871 51. Helbig AO, Gauci S, Raijmakers R, van Breukelen B, Slijper M, Mohammed S, et al.  
872 Profiling of N -Acetylated Protein Termini Provides In-depth Insights into the N-terminal  
873 Nature of the Proteome. *Mol Cell Proteomics*. 2010 May;9(5):928–39.
- 874 52. Zhang P, Liu P, Xu Y, Liang Y, Wang PG, Cheng J. N-acetyltransferases from three  
875 different organisms displaying distinct selectivity toward hexosamines and N-terminal amine  
876 of peptides. *Carbohydr Res*. 2019 Jan;472(November 2018):72–5.
- 877 53. El-Gebali S, Mistry J, Bateman A, Eddy SR, Luciani A, Potter SC, et al. The Pfam protein  
878 families database in 2019. *Nucleic Acids Res*. 2019;47(D1):D427–32.
- 879 54. Sigrist CJA, De Castro E, Cerutti L, Cuče BA, Hulo N, Bridge A, et al. New and continuing  
880 developments at PROSITE. *Nucleic Acids Res*. 2013;41(D1):344–7.
- 881 55. Dawson NL, Lewis TE, Das S, Lees JG, Lee D, Ashford P, et al. CATH: An expanded  
882 resource to predict protein function through structure and sequence. *Nucleic Acids Res*.  
883 2017;45(D1):D289–95.
- 884 56. Van Damme P, Kalvik T V, Starheim KK, Jonckheere V, Myklebust LM, Menschaert G, et  
885 al. A Role for Human N-alpha Acetyltransferase 30 (Naa30) in Maintaining Mitochondrial  
886 Integrity. *Mol Cell Proteomics*. 2016 Nov;15(11):3361–72.
- 887 57. Bienvenut W V., Sumpton D, Martinez A, Lilla S, Espagne C, Meinnel T, et al. Comparative  
888 large scale characterization of plant versus mammal proteins reveals similar and idiosyncratic  
889 N- $\alpha$ -acetylation features. *Mol Cell Proteomics*. 2012;11(6):1–14.
- 890 58. Goetze S, Qeli E, Mosimann C, Staes A, Gerrits B, Roschitzki B, et al. Identification and  
891 Functional Characterization of N-Terminally Acetylated Proteins in *Drosophila*  
892 *melanogaster*. MacCoss MJ, editor. *PLoS Biol*. 2009 Nov 3;7(11):e1000236.
- 893 59. Aksnes H, Ree R, Arnesen T. Co-translational, Post-translational, and Non-catalytic Roles of  
894 N-Terminal Acetyltransferases. Vol. 73, *Molecular Cell*. 2019. p. 1097–114.
- 895 60. Huang Y, Niu B, Gao Y, Fu L, Li W. CD-HIT Suite: a web server for clustering and  
896 comparing biological sequences. *Bioinformatics*. 2010 Mar 1;26(5):680–2.

- 897 61. Gerlt JA, Bouvier JT, Davidson DB, Imker HJ, Sadkhin B, Slater DR, et al. Enzyme function  
898 initiative-enzyme similarity tool (EFI-EST): A web tool for generating protein sequence  
899 similarity networks. Vol. 1854, *Biochimica et Biophysica Acta - Proteins and Proteomics*.  
900 Elsevier B.V.; 2015. p. 1019–37.
- 901 62. Nepusz T, Yu H, Paccanaro A. Detecting overlapping protein complexes in protein-protein  
902 interaction networks. *Nat Methods*. 2012 May 18;9(5):471–2.
- 903 63. Shannon P, Markiel A, Ozier O, Baliga NS, Wang JT, Ramage D, et al. Cytoscape: A  
904 software Environment for integrated models of biomolecular interaction networks. *Genome*  
905 *Res*. 2003 Nov 1;13(11):2498–504.
- 906 64. Bailey T, Elkan C. Bailey, T.L. & Elkan, C. Fitting a mixture model by expectation  
907 maximization to discover motifs in biopolymers. *Proc. Int. Conf. Intell. Syst. Mol. Biol.* 2,  
908 28-36. *Proc Int Conf Intell Syst Mol Biol*. 1994 Feb 1;2:28–36.
- 909 65. Bailey TL, Boden M, Buske FA, Frith M, Grant CE, Clementi L, et al. MEME Suite: Tools  
910 for motif discovery and searching. *Nucleic Acids Res*. 2009;37(SUPPL. 2):202–8.
- 911 66. Rebowski G, Boczkowska M, Drazic A, Ree R, Goris M, Arnesen T, et al. Mechanism of  
912 actin N-terminal acetylation. *Sci Adv*. 2020 Apr 8;6(15):eaay8793.
- 913 67. Agarwala R, Barrett T, Beck J, Benson DA, Bollin C, Bolton E, et al. Database resources of  
914 the National Center for Biotechnology Information. *Nucleic Acids Res*. 2016 Jan  
915 4;44(D1):D7–19.
- 916 68. Chen JY, Liu L, Cao CL, Li MJ, Tan K, Yang X, et al. Structure and function of human  
917 Naa60 (NatF), a Golgi-localized bi-functional acetyltransferase. *Sci Rep*. 2016;6(March):1–  
918 12.
- 919 69. Weyer FA, Gumiero A, Lapouge K, Bange G, Kopp J, Sinning I. Structural basis of HypK  
920 regulating N-terminal acetylation by the NatA complex. *Nat Commun*. 2017 Aug  
921 6;8(1):15726.
- 922 70. Holm L. Benchmarking fold detection by DaliLite v.5. Elofsson A, editor. *Bioinformatics*.



- 923 2019 Dec 15;35(24):5326–7.
- 924 71. Holm L, Kaariainen S, Rosenstrom P, Schenkel A. Searching protein structure databases  
925 with DaliLite v.3. *Bioinformatics*. 2008 Dec 1;24(23):2780–1.
- 926 72. Liszczak G, Marmorstein R. Implications for the evolution of eukaryotic amino-terminal  
927 acetyltransferase (NAT) enzymes from the structure of an archaeal ortholog. *Proc Natl Acad  
928 Sci U S A*. 2013;110(36):14652–7.
- 929 73. Abboud A, Bédoucha P, Byška J, Arnesen T, Reuter N. Dynamics-function relationship in  
930 the catalytic domains of N-terminal acetyltransferases. *Comput Struct Biotechnol J*.  
931 2020;18:532–47.
- 932 74. Obsil T, Ghirlando R, Klein DC, Ganguly S, Dyda F. Crystal Structure of the 14-3-  
933 3ζ:Serotonin N-Acetyltransferase Complex. *Cell*. 2001;105(2):257–67.
- 934 75. Ganguly S, Mummaneni P, Steinbach PJ, Klein DC, Coon SL. Characterization of the  
935 *Saccharomyces cerevisiae* Homolog of the Melatonin Rhythm Enzyme Arylalkylamine N-  
936 Acetyltransferase (EC 2.3.1.87). *J Biol Chem*. 2001;276(50):47239–47.
- 937 76. Liu B, Sutton A, Sternglanz R. A yeast polyamine acetyltransferase. *J Biol Chem*.  
938 2005;280(17):16659–64.
- 939 77. Angus-Hill ML, Dutnall RN, Tafrov ST, Sternglanz R, Ramakrishnan V. Crystal structure of  
940 the histone acetyltransferase Hpa2: a tetrameric member of the Gcn5-related N-  
941 acetyltransferase superfamily. *J Mol Biol*. 1999 Dec;294(5):1311–25.
- 942 78. Van Damme P, Hole K, Gevaert K, Arnesen T. N-terminal acetylome analysis reveals the  
943 specificity of Naa50 (Nat5) and suggests a kinetic competition between N-terminal  
944 acetyltransferases and methionine aminopeptidases. *Proteomics*. 2015;15(14):2436–46.
- 945 79. Yang X, Yu W, Shi L, Sun L, Liang J, Yi X, et al. HAT4, a Golgi Apparatus-Anchored B-  
946 Type Histone Acetyltransferase, Acetylates Free Histone H4 and Facilitates Chromatin  
947 Assembly. *Mol Cell*. 2011;44(1):39–50.
- 948 80. Lu Vo TT, Park JH, Lee EJ, Kim Nguyen YT, Woo Han B, Thu Nguyen HT, et al.

- 949 Characterization of lysine acetyltransferase activity of recombinant human ARD1/NAA10.  
950 Molecules. 2020;25(3):1–14.
- 951 81. Magin RS, March ZM, Marmorstein R. The N-terminal acetyltransferase Naa10/ARD1 does  
952 not acetylate lysine residues. *J Biol Chem*. 2016;291(10):5270–7.
- 953 82. Van Damme P, Evjenth R, Foyn H, Demeyer K, De Bock P-J, Lillehaug JR, et al. Proteome-  
954 derived Peptide Libraries Allow Detailed Analysis of the Substrate Specificities of N  $\alpha$  -  
955 acetyltransferases and Point to hNaa10p as the Post-translational Actin N  $\alpha$  -  
956 acetyltransferase. *Mol Cell Proteomics*. 2011 May;10(5):M110.004580.
- 957 83. Arnesen T, Anderson D, Torsvik J, Halseth HB, Varhaug JE, Lillehaug JR. Cloning and  
958 characterization of hNAT5/hSAN: An evolutionarily conserved component of the NatA  
959 protein N- $\alpha$ -acetyltransferase complex. *Gene*. 2006 Apr;371(2):291–5.
- 960 84. Gautschi M, Just S, Mun A, Ross S, Rücknagel P, Dubaquié Y, et al. The Yeast N $\alpha$ -  
961 Acetyltransferase NatA Is Quantitatively Anchored to the Ribosome and Interacts with  
962 Nascent Polypeptides. *Mol Cell Biol*. 2003 Oct 15;23(20):7403–14.
- 963 85. Aksnes H, Goris M, Strømmland Ø, Drazic A, Waheed Q, Reuter N, et al. Molecular  
964 determinants of the N-terminal acetyltransferase Naa60 anchoring to the Golgi membrane. *J*  
965 *Biol Chem*. 2017 Apr 21;292(16):6821–37.
- 966 86. Bae B, Cobb RE, DeSieno MA, Zhao H, Nair SK. New N-acetyltransferase fold in the  
967 structure and mechanism of the phosphonate biosynthetic enzyme FrbF. *J Biol Chem*.  
968 2011;286(41):36132–41.
- 969 87. Sapountzi V, Côté J. MYST-family histone acetyltransferases: beyond chromatin. *Cell Mol*  
970 *Life Sci*. 2011;68(7):1147–56.
- 971 88. Sigrist CJA, Cerutti L, Hulo N, Gattiker A, Falquet L, Pagni M, et al. PROSITE: a  
972 documented database using patterns and profiles as motif descriptors. *Brief Bioinform*.  
973 2002;3(3):265–74.
- 974 89. Godzik A, Jaroszewski L, Li W. Clustering of highly homologous sequences to reduce the

- 975 size of large protein databases. *Bioinformatics*. 2001 Mar;17(3):282–3.
- 976 90. El-gebali S, Mistry J, Bateman A, Eddy SR, Potter SC, Qureshi M, et al. The Pfam protein  
977 families database in 2019. 2019;47(October 2018):427–32.
- 978 91. Eddy SR. Profile hidden Markov models. *Bioinformatics*. 1998;14(9):755–63.
- 979 92. Brandes U. A faster algorithm for betweenness centrality. *J Math Sociol*. 2001  
980 Jun;25(2):163–77.
- 981 93. Bailey TL, Gribskov M. Combining evidence using p-values: Application to sequence  
982 homology searches. *Bioinformatics*. 1998;14(1):48–54.
- 983 94. Watts DJ, Strogatz SH. Collective dynamics of ‘small-world’ networks. *Nature*. 1998  
984 Jun;393(6684):440–2.
- 985 95. Hagberg AA, Schult DA, Swart PJ. Exploring network structure, dynamics, and function  
986 using NetworkX. 7th Python Sci Conf (SciPy 2008). 2008;(SciPy):11–5.
- 987 96. Sievers F, Wilm A, Dineen D, Gibson TJ, Karplus K, Li W, et al. Fast, scalable generation of  
988 high-quality protein multiple sequence alignments using Clustal Omega. *Mol Syst Biol*. 2011  
989 Jan 11;7(1):539.
- 990 97. Katoh K, Rozewicki J, Yamada KD. MAFFT online service: Multiple sequence alignment,  
991 interactive sequence choice and visualization. *Brief Bioinform*. 2018;20(4):1160–6.
- 992 98. Darriba D, Taboada GL, Doallo R, Posada D. ProtTest 3: Fast selection of best-fit models of  
993 protein evolution. *Bioinformatics*. 2011 Apr 15;27(8):1164–5.
- 994 99. Jones DT, Taylor WR, Thornton JM. The rapid generation of mutation data matrices from  
995 protein sequences. *Bioinformatics*. 1992 Jun 1;8(3):275–82.
- 996 100. Le SQ, Gascuel O. An improved general amino acid replacement matrix. *Mol Biol Evol*.  
997 2008;25(7):1307–20.
- 998 101. Kosiol C, Goldman N. Different versions of the dayhoff rate matrix. *Mol Biol Evol*.  
999 2005;22(2):193–9.
- 1000 102. Dayhoff MO, Schwartz RM, Orcutt BC. A model of evolutionary change in proteins.

- 1001 Washington, D.C: National Biomedical Research Foundation; 1978. 345–352 p.
- 1002 103. Whelan S, Goldman N. A general empirical model of protein evolution derived from  
1003 multiple protein families using a maximum-likelihood approach. *Mol Biol Evol.*  
1004 2001;18(5):691–9.
- 1005 104. Müller T, Vingron M. Modeling Amino Acid Replacement. *J Comput Biol.* 2000  
1006 Dec;7(6):761–76.
- 1007 105. Steel M, Huson D, Lockhart PJ. Invariable sites models and their use in phylogeny  
1008 reconstruction. *Syst Biol.* 2000;49(2):225–32.
- 1009 106. Yang Z. Maximum likelihood phylogenetic estimation from DNA sequences with variable  
1010 rates over sites: Approximate methods. *J Mol Evol.* 1994;39(3):306–14.
- 1011 107. Gu X, Fu Y, Li W. Maximum likelihood estimation of the heterogeneity of substitution rate  
1012 among nucleotide sites. *Mol Biol Evol.* 1995 Jul;12(4):546–557.
- 1013 108. Stamatakis A. RAxML version 8: A tool for phylogenetic analysis and post-analysis of large  
1014 phylogenies. *Bioinformatics.* 2014;30(9):1312–3.
- 1015 109. Pattengale ND, Alipour M, Bininda-Emonds ORP, Moret BME, Stamatakis A. How many  
1016 bootstrap replicates are necessary? *J Comput Biol.* 2010;17(3):337–54.
- 1017 110. Lemoine F, Domelevo Entfellner J-B, Wilkinson E, Correia D, Dávila Felipe M, De Oliveira  
1018 T, et al. Renewing Felsenstein’s phylogenetic bootstrap in the era of big data. *Nature.* 2018  
1019 Apr 18;556(7702):452–6.
- 1020 111. Foyn H, Thompson PR, Arnesen T. DTNB-Based Quantification of In Vitro Enzymatic N-  
1021 Terminal Acetyltransferase Activity. In: Schilling O, editor. New York, NY: Springer New  
1022 York; 2017. p. 9–15.

1023

1024

1025

1026

1027 **Supplementary information captions**

1028

1029 **S1 Supplementary Information.supplementary\_information.pdf**

1030 Supplementary Methods, Figures and Tables.

1031

1032 **S1 File. SSN\_dataset\_(full\_lenght\_sequences).txt**

1033 Sequences used to calculate the full-length sequence SSN, given in the FASTA format.

1034

1035 **S2 File. SSN\_dataset\_(only\_GNAT\_domain).txt**

1036 Sequences used to calculate SSNs for the GNAT domain portion of sequences. All sequences are

1037 provided in the FASTA format

1038

1039 **S3 File. Phylogenetic\_tree.txt**

1040 Phylogenetic tree of the GNAT acetyltransferase superfamily calculated using RAxML in newick

1041 format. Leaves of the tree are labeled with accession numbers of a given protein and a corresponding

1042 cluster number. Inner nodes of the tree are labeled with calculated support values for each node.

1043

1044 **S4 File. MSA\_for\_phylogeny.txt**

1045 Multiple sequence alignment used for calculating the phylogenetic tree.

1046

1047 **S5 File. Group\_5\_sequence\_motifs.txt**

1048 Sequence motifs for Group 5 of NATs calculated using MEME tool from MEME Suite.

1049 The file contains

1050 1) motif P-values;

1051 2) block diagrams showing the position of the motifs on the relevant sequences;

1052 3) PSSM;

1053 4) position-specific probability matrix;

1054 5) regular expression for the given motif.

1055

1056 **S6 File. Group\_5\_motifs\_position\_on\_sequence.txt**

1057 Positions of Group 5 sequence motifs on the representative sequence calculated using MAST from  
1058 MEME Suite.

1059

1060 **S7 File. Cluster\_97\_SEQ.txt**

1061 Sequences in FASTA format found in cluster 97 of our full-sequence SSN. These sequences belong  
1062 to the NAA70 plastid N-terminal acetyltransferase and were used as the dataset for calculating Group  
1063 5 sequence motifs.

1064

1065 **S8 File. cluster\_numbers.xls**

1066 This is the table of all proteins from our SSN. The table contains accession numbers, Uniprot  
1067 annotation status (SwissProt/TrEMBL), description and a corresponding cluster number for each of  
1068 the proteins.

1069

1070 **S9 File. full\_sequence\_SSN.xgmml.zip**

1071 SSN calculated based on the full-length sequence acetyltransferase dataset.

1072
